# **TOB is an effector of the hippocampus-mediated acute stress response**

Mohieldin Youssef<sup>1</sup>, Hiro Taiyo Hamada<sup>2</sup>, Esther Suk King Lai<sup>3</sup>, Yuji Kiyama<sup>4</sup>, Mohamed Eltabbal<sup>5</sup>, Hiroshi Kiyonari<sup>6</sup>, Kohei Nakano<sup>6</sup>, Bernd Kuhn<sup>5</sup>, Tadashi Yamamoto<sup>1\*</sup>

<sup>1</sup> Cell Signal Unit, Okinawa Institute of Science and Technology Graduate University, Okinawa, Japan.

<sup>2</sup> Neural Computation Unit, Okinawa Institute of Science and Technology Graduate University, Okinawa, Japan.

<sup>3</sup> Neural Circuit Unit, Okinawa Institute of Science and Technology Graduate University, Okinawa, Japan.

<sup>4</sup> Laboratory of Biochemistry and Molecular Biology, Graduate school of medical and dental sciences, Kagoshima University, Japan.

<sup>5</sup> Optical Neuroimaging Unit, Okinawa Institute of Science and Technology Graduate University, Okinawa, Japan.

<sup>6</sup> Laboratory for Animal Resources and Genetic Engineering, RIKEN Center for Biosystems Dynamics Research, Kobe, Hyogo, Japan.

\*Correspondence to [tadashi.yamamoto@oist.jp](mailto:tadashi.yamamoto@oist.jp)

38  
39  
40  
41  
42  
43  
44  
45  
46  
47  
48  
49  
50  
51  
52  
53  
54  
55  
56  
57  
58  
59  
60  
61  
62  
63  
64  
65  
66  
67  
68  
69  
70

## Abstract

Stress affects behavior and involves critical dynamic changes at multiple levels ranging from molecular pathways to neural circuits and behavior. Abnormalities at any of these levels lead to decreased stress resilience and pathological behavior. However, temporal modulation of molecular pathways underlying stress response remains poorly understood. Transducer of ErbB2.1, known as TOB, (TOB1) is involved in different physiological functions, including cellular stress and immediate response to stimulation. In this study, we investigated the role of TOB in the brain's stress machinery at molecular, neural circuit, and behavioral levels. Interestingly, TOB protein levels increased after mice were exposed to acute stress. At the neural circuit level, functional magnetic resonance imaging (fMRI) suggested that intra-hippocampal and hippocampal-prefrontal connectivity were dysregulated in *Tob* knockout (*Tob*-KO) mice. Electrophysiological recordings in hippocampal slices showed increased postsynaptic AMPAR-mediated neurotransmission, accompanied by decreased GABA neurotransmission and subsequently altered Excitatory/Inhibitory balance after *Tob* deletion. At the behavioral level, *Tob*-KO mice show abnormal, hippocampus-dependent, contextual fear conditioning and extinction, and depression-like behaviors. On the other hand, increased anxiety observed in *Tob*-KO mice is hippocampus-independent. At the molecular level, we observed decreased stress-induced LCN2 expression and ERK phosphorylation, as well as increased MKP-1 expression. This study suggests that TOB serves as an important modulator in hippocampal stress signaling machinery. In summary, we show a molecular pathway and neural circuit mechanism by which TOB deletion contributes to expression of pathological stress-related behavior.

71

## Introduction

72 On a daily basis, we encounter stressful events to which our bodies generate different responses  
73 and store memories to cope with future occurrences. The brain utilizes several mechanisms to  
74 cope with psychological stress, and defects in such mechanisms or exposure to excessive stress  
75 can increase individual vulnerability to neuropsychiatric disorders like depression and post-  
76 traumatic stress disorder (PTSD)<sup>1</sup>. Strikingly, it is estimated that 50% of adults have  
77 experienced a traumatic event during their lifetimes. Therefore, it is imperative that we  
78 investigate mechanisms that underlie stress responses and identify potential therapeutic targets  
79 coordinating stress resilience<sup>2,3</sup>.

80 The stress coping response is orchestrated at various intercalated layers which include brain  
81 connectivity, neuronal activity, molecular signaling, and resulting behavior<sup>4</sup>. Any change in  
82 stress resilience mechanisms can induce psychiatric consequences, such as increased fear,  
83 anxiety, and depression. Such behaviors are controlled by neuronal circuits governing  
84 emotional and fight-flight responses, like the hippocampus, prefrontal cortex, amygdala, and  
85 hypothalamus<sup>5</sup>. fMRI is currently the most advanced, non-invasive method to map dynamic  
86 changes in brain circuits that regulate stress coping<sup>6,7</sup>. In response to stress, abnormal neuronal  
87 circuit remodeling may occur, leading to altered brain connectivity. Several molecules have  
88 been implicated in these remodeling events, like lipocalin-2 (LCN2) and corticotrophin-  
89 releasing factor (CRF)<sup>8</sup>. The Hypothalamic-Pituitary Adrenal (HPA) axis is a hormonal  
90 signaling pathway that is moderately activated to elicit adaptation to induced stress at  
91 molecular, cellular, physiological, and behavioral levels<sup>9</sup>. At the molecular level, acute stress  
92 induces transcriptional and translation responses in order to cope with stress<sup>10,11</sup>. This transient  
93 change in molecular signaling is believed to have neuronal protective functions<sup>12</sup>. Our  
94 knowledge of the hippocampal molecular stress machinery is limited; therefore, there are  
95 continuing efforts to identify genes that function in stress coping responses<sup>13</sup>. Interestingly,  
96 several molecules with known functions in cellular stress response have also been implicated  
97 in psychological stress-coping mechanisms, e.g., EGR1<sup>14,15</sup>.

98 TOB has been proposed to regulate learning and memory, yet the mechanism is unknown<sup>16,17</sup>.  
99 Notably, *Tob* is one of the early response genes after either neuronal depolarization in  
100 excitatory neurons or stress in humans<sup>18,19</sup>. In addition, TOB protein expression is elevated in  
101 hippocampus and cerebellum after behavioral tests like fear conditioning and rotarod tests in  
102 rats, respectively<sup>16,17</sup>. Moreover, decreased *Tob* gene expression has been correlated with  
103 depression<sup>20</sup>. Taken together, this suggests that TOB participates in neuronal molecular  
104 machinery and behavioral phenotypes. On the other hand, we previously showed that TOB  
105 exhibits a unique transient elevation after exposure to UV stress, halting apoptosis, and then  
106 eliciting an apoptotic signal after undergoing proteasome-dependent degradation<sup>21</sup>. In this  
107 manner, TOB allows cells to recover through DNA repair mechanisms<sup>22</sup>. Furthermore,  
108 overexpression of TOB in human bronchial epithelial cells leads to protection from ionizing  
109 radiation-mediated cell death, increased ERK phosphorylation, and induced expression of  
110 DNA repair proteins<sup>23</sup>. Stimulation using BMP-2, which induces oxidative stress, led to  
111 increased TOB protein expression<sup>24,25</sup>. This suggests that TOB contributes to stress machinery,

112 mostly protective, at both the cellular and molecular levels. However, TOB's function in  
113 psychological stress remains enigmatic.

114 Utilizing *Tob*-KO mice, we show that TOB has a functional role in stress coping behavior in  
115 the brain by regulating hippocampal connectivity, neuronal excitability, and temporal  
116 molecular changes induced by stress. Increased TOB protein expression in mouse brain after  
117 exposure to acute stress, accompanied by the abnormal behavioral phenotype in *Tob*-KO mice,  
118 reveals TOB as key molecular effector in the brain's stress resilience.

119

120

## Results

### 121 **TOB protein increases in response to stress**

122 TOB's function as an anti-proliferative protein is well known, but the potential role it plays in  
123 regulating brain function is not well understood<sup>16-18, 20, 26, 27</sup>. With this objective, we analyzed  
124 levels of TOB protein in mouse brain. We show that TOB is ubiquitously expressed across  
125 various regions of mouse brain (Fig. 1A). Effector proteins controlling neuronal functions  
126 usually show synaptic expression patterns<sup>28</sup>. Likewise, TOB protein is localized in the neuronal  
127 synaptic fraction, including synapto-neurosomes, pre-synapses and post-synapses (Fig. 1B).  
128 TOB responds to cellular stress, neuronal activation, and glucocorticoid stimulation<sup>18, 19, 21</sup>.  
129 Therefore, we examined whether TOB protein levels change in response to acute psychological  
130 stress. Restraint stress and inescapable electric shock are widely used models of acute  
131 psychological stress<sup>29, 30</sup>. The hippocampus is associated with responses to acute stress<sup>31</sup> and  
132 in the hippocampus, TOB protein increased by 49.5% and 59.3% at 3 and 5 hours ( $F_{4,15}=6.050$ ,  
133  $p=0.0042$ ; No stress vs 3h  $p=0.0205$  and No stress vs 5h  $p=0.0058$ ) post-exposure to 30 min of  
134 restraint stress, respectively, compared to non-stressed mice (Fig. 1C). Additionally,  
135 hippocampal TOB increased by 63.8% ( $F_{4,10}=5.849$ ,  $p=0.0108$ ; No stress vs 1hr  $p=0.0221$ ) 1 h  
136 after mice were introduced to inescapable electric shock stress (Fig. 1D). ERK phosphorylation  
137 levels also increased after acute stress, concurrently with TOB expression. Thus, TOB is  
138 expressed in the mouse brain and its expression is increased following acute stress.

139

### 140 **Deletion of *Tob* alters the brain's functional connectivity**

141 Next, we sought to investigate the functional influence of *Tob* deletion on brain activity with  
142 resting-state functional magnetic resonance imaging (rs-fMRI) in the awake state with  
143 habituation to a small rodent MRI scanner. Awake resting-state fMRI for small animals allows  
144 us to observe brain-wide synchronization of hemodynamic signals across multiple brain  
145 regions. Prior to awake rs-fMRI sessions, *Tob*-KO and WT groups underwent habituation  
146 training for 7 days in a mock MRI environment with MRI scanning sounds (Fig. 2A-C). In  
147 order to check functional association with hippocampal CA1 and mPFC, we performed seed-  
148 based functional connectivity (FC) analysis and contrasted *Tob*-KO and WT groups. The seed-  
149 based FC analysis with bilateral CA1 revealed the statistical significance of FC with Dentate  
150 Gyrus (DG;  $p < 0.05$  with FDR correction, Fig. 2D) and the primary somatosensory area  
151 (PSSA;  $p < 0.05$  with FDR correction; Fig. S1). The previous analysis of CA1 revealed

152 positively higher FC with DG and negatively higher FC with PSSA ( $p < 0.01$  by Mann-Whitney  
153 U test; Fig. 2E). Furthermore, the seed-based FC analysis with mPFC revealed the statistical  
154 significance with DG ( $p < 0.05$  with FDR correction; Fig. 2F) and SMA (SMA;  $p < 0.05$  with  
155 FDR correction; Fig. S1). The previous analysis of mPFC also showed negatively higher FC  
156 with DG and SMA ( $p < 0.01$  by Mann-Whitney U test; Fig. 2G). Our results imply that *Tob*  
157 KO may influence functional associations within hippocampal complex (HC) and between HC  
158 and mPFC.

159

### 160 **Altered excitatory/inhibitory balance in *Tob*-KO hippocampal slices**

161 To test whether *Tob* deletion alters synaptic function, we performed whole-cell patch clamp  
162 recordings in hippocampal CA1 pyramidal neurons in acute brain slices. We first investigated  
163 excitatory synaptic transmission in hippocampal CA1 pyramidal neurons. We found that *Tob*  
164 deletion significantly increased the amplitude (Fig. 3B), but not the frequency (Fig. 3C) of  
165 spontaneous miniature excitatory postsynaptic currents (mEPSC) when compared to WT mice.  
166 This selective change in mEPSC amplitude suggests that TOB deletion may enhance the  
167 number of postsynaptic receptors and/or the size of released presynaptic vesicles.

168 We further explored whether AMPA and NMDA receptors, the two major glutamate receptor  
169 classes mediating fast excitatory synaptic transmission, contribute to the dysregulation after  
170 TOB deletion (Fig. 3A-C). We characterized AMPA receptor-mediated synaptic transmission  
171 at CA3-CA1 synapses in the hippocampus by assessing the input (stimulation intensity)-output  
172 (EPSC amplitude) efficiency and voltage dependence of synaptic AMPA-mediated synaptic  
173 responses in the presence of the NMDA receptor antagonist, D-APV. Slopes of the linear fit  
174 for individual AMPA-mediated input-output experiments were significantly different in KO  
175 mice compared to those of WT ( $p = 0.0039$ ) (Fig. 3D). No apparent difference between  
176 genotypes was found in the current-voltage (I-V) curve (Fig. 3E). The rectification index of  
177 AMPA receptor-mediated responses from *Tob*-KO was also comparable to that of WT (WT:  
178  $0.861 \pm 0.08$ ; KO:  $0.783 \pm 0.07$ ;  $p = 0.568$  with the Mann-Whitney U test). Moreover, AMPA  
179 receptor-mediated, paired-pulse facilitation was slightly increased in KO synapses (Fig. 3F),  
180 most pronouncedly at 10-ms inter-pulse intervals ( $p = 0.032$ ). This suggested that TOB deletion  
181 resulted in an increase in the number of mature postsynaptic AMPA receptors without changing  
182 the AMPA receptor subunit composition.

183 We next investigated NMDA receptor-mediated synaptic transmission at CA3-CA1 synapses  
184 in the hippocampus. We measured the input-output relationship and I-V curve of synaptic  
185 NMDA receptor-mediated synaptic responses in the presence of the AMPA receptor antagonist,  
186 NBQX. We found no apparent differences between genotypes (Fig. S2 A-B). The rectification  
187 index of NMDA receptor-mediated responses from *Tob*-KO was also similar to that of wild-  
188 type (WT:  $2.959 \pm 0.444$ ; KO:  $2.032 \pm 0.136$ ;  $p = 0.135$  with the Mann-Whitney U test).

189 We further examined inhibitory synaptic functions in hippocampal CA1 pyramidal neurons.  
190 The amplitude (Fig. 3H), but not the frequency (Fig. 3I) of miniature inhibitory postsynaptic  
191 currents (mIPSCs) were reduced in *Tob*-KO mice, compared to that of wild-type mice (Fig.

192 3G-I). These results indicate that TOB deletion affects both excitatory and inhibitory synaptic  
193 transmission.

194 Next, we directly estimated the ratio of excitation to inhibition in hippocampal pyramidal  
195 neurons. We first recorded AMPA receptor-mediated EPSCs at a holding potential of -60 mV,  
196 equivalent to the Cl<sup>-</sup> equilibrium potential. Then we recorded GABA<sub>A</sub> receptor-mediated  
197 IPSCs at a holding potential of 0 mV, which is the reverse potential of AMPA and NMDA  
198 receptors. We then calculated the ratio of EPSC amplitude to that of IPSC amplitude (E/I ratio)  
199 and found that the E/I ratio was markedly increased in *Tob*-KO mice (Fig. 3J-L).

200

### 201 ***Tob*-KO mice show abnormal stress-related behavior**

202 Contextual fear conditioning includes exposing mice to aversive acute stress caused by  
203 inescapable electric shocks. Then brain regions respond by associating the context to such a  
204 stimulus. Fearful mice freeze when exposed to the same context in which conditioning occurred.  
205 On the other hand, contextual fear extinction is the subsidence of fear response due to repetitive  
206 exposure to the same context without shock presentation<sup>32</sup>. After fear conditioning, *Tob*-KO  
207 mice exhibited increased contextual fear freezing ( $F_{3,30}=10.77$ ,  $p<0.0001$  for genotype effect;  
208  $F_{15,150}=2.727$ ,  $p=0.0010$  for time x genotype effect; WT vs KO at Day 1  $p<0.0001$ , Day 2  
209  $p<0.0001$ , Day 3  $p=0.0003$ , Day 4  $p=0.0342$ ) (Fig. 4A). Overexpression of TOB in the  
210 hippocampus rescued the abnormal fear phenotype as *Tob*-KO (AAV\_mTob) did not exhibit  
211 significant fear compared to *Tob*-WT(AAV\_mTob) any time after conditioning. Additionally,  
212 KO mice rescued through overexpression of AAV\_mTob, showed significantly less freezing  
213 when compared to KO (KO(AAV\_mTob) vs KO at Day 1  $p<0.0001$ , Day 2  $p<0.0001$ , Day 3  
214  $p=0.0058$ ) (Fig. 4A, S3 A-D). TOB deletion in the hippocampus causes an increased fear  
215 response to an aversive context and decreased extinction, which was reversed by re-expression  
216 of TOB.

217 The forced swim test, in which immobility is associated with increased despair, is widely used  
218 to test depression-like behavior, but it is also an efficient test of the ability to cope with stress<sup>33</sup>.  
219 *Tob*-KO mice showed increased immobility in the forced swim test ( $F_{3,28}=13.50$ ,  $p<0.0001$ ;  
220 WT vs KO  $p=0.0003$ ). Re-expression of TOB in the hippocampus of *Tob*-KO mice reduced  
221 immobility (KO(AAV\_mTob) vs KO  $p=0.0008$ ; WT(AAV\_mTob) vs KO(AAV\_mTob)  
222  $p>0.9999$ ) (Fig. 4B). Similarly, we observed increased immobility by *Tob*-KO mice in the tail  
223 suspension test, which was rescued by TOB overexpression in the hippocampus (Fig. S3E).  
224 This shows that TOB in the hippocampus is important for coping with stress.

225 Since anxiety is usually observed in models showing abnormal stress coping mechanisms, we  
226 next analyzed anxiety in our mouse model. *Tob*-KO mice spent less time in the open arm of  
227 the elevated-plus maze, an indication of increased anxiety ( $F_{3,30}=3.948$ ,  $p=0.0174$ ; WT vs KO  
228  $p=0.0283$ ) (Fig. 4C). Unlike in fear conditioning, TOB re-expression in hippocampus did not  
229 decrease anxiety in KO mice, as time spent in the open arm was not significantly different.

230 In the open-field test, *Tob*-KO mice spent less time in the center region than WT mice  
231 ( $F_{3,37}=4.263$ ,  $p=0.0111$ ; WT vs KO  $p=0.0309$ ; WT(AAV\_mTob) vs KO(AAV\_mTob)  
232  $p=0.3621$ ) (Fig. 4D, S3 F-H). Although the time spent in center region was still low after

233 overexpression of AAV\_mTob in the hippocampi of KO mice, there was no significant  
234 difference between WT(AAV\_mTob) and KO(AAV\_mTob). Therefore, we believe that the  
235 increased anxiety in Tob KO mice is not hippocampus-dependent.

236 In order to identify specific brain areas associated with *Tob* behavioral deficiencies, we  
237 generated hippocampus-specific *Tob*-KO mice (hsTobKO) using the Cre-loxP system. First,  
238 *loxP* sequences flanking exon2 were inserted in the *Tob* gene (*Tob<sup>fl/fl</sup>*) (Fig. S4A). Adeno-  
239 associated virus expressing Cre recombinase under the human synapsin 1 (*hSyn*) promoter  
240 (AAV\_hSyn\_Cre) was injected into the dorsal hippocampus of *Tob<sup>fl/fl</sup>* mice to delete *Tob*  
241 specifically in this region in adult mice (Fig. 4E, S4B-C). We then analyzed behavior of  
242 hsTobKO mice. Freezing in the same context, where mice had undergone fear conditioning,  
243 and subsequent extinction trials were increased after TOB deletion in hippocampus  
244 ( $F_{1,14}=26.11$ ,  $p=0.0002$  for genotype effect;  $F_{5,70}=4.701$ ,  $p=0.0009$  for time x genotype effect;  
245 AAV\_hSyn\_Cre vs *Tob<sup>fl/fl</sup>* at Day 1  $p<0.0001$ , Day 2  $p<0.0001$ , Day 3  $p=0.0148$ , Day 4  
246  $p=0.1301$ ) (Fig. 4F). Additionally, hsTobKO did not show abnormal cued fear (Fig. S4D-E).  
247 Depression-like behavior was observed in hsTobKO mice in that immobility time was higher  
248 during the forced swim test (t-test  $p=0.0193$ ; Fig. 4G), and tail suspension test (Fig. S4F). On  
249 the other hand, anxiety levels were normal, and time spent in the open arm did not differ in  
250 hsTobKO and *Tob<sup>fl/fl</sup>* mice (t-test  $p=0.3329$ ) (Fig. 4H). Also, no abnormal anxiety was observed  
251 in hsTobKO mice, as there was no change in time spent in the center of the open field test (t-  
252 test  $p=0.0972$ ) was observed (Fig. 4I, S4G-H). These results show that TOB in the  
253 hippocampus is important for normal fear and depression behaviors.

254

### 255 **Abnormal transient transcriptional profile in hippocampus of Tob KO mice and** 256 **suppressed stress-induced LCN2 expression induced after fear conditioning.**

257 Stress stimulates neuronal activation, which in return induces changes in the underlying  
258 molecular signaling pathways. Abnormal responses at the molecular level would lead to  
259 aberrant stress coping behavior. Since *Tob*-KO mice showed increased contextual fear and  
260 abnormal extinction, we analyzed hippocampal transcriptomic changes after fear conditioning.  
261 To analyze rapid changes resulting from aversive stimuli in fear conditioning, we performed  
262 RNA sequencing on hippocampal RNA from mice culled at 15 min, 1 h, and 3 h post-  
263 conditioning, in addition to naïve mice. When compared to WT mice, differentially expressed  
264 genes in *Tob*-KO mice were 3,3,2 upregulated and 2,1,3 downregulated genes for naïve mice,  
265 and 1 h and 3 h post-training, respectively (Fig. 5A). Strikingly, the greatest differential  
266 transcriptome changes in *Tob*-KO occurred 15 min after conditioning, in that 26 genes were  
267 upregulated and 11 genes were downregulated (EdgeR WT vs KO 15 min after fear  
268 conditioning,  $p<0.05$ , FDR<0.05). Therefore, TOB deletion altered the rapid change in the  
269 hippocampal transcriptome after fear conditioning.

270 To understand the possible molecular pathway governing this transcriptomic change, we  
271 performed pathway analysis. Pathway analysis for differentially expressed genes 15 min after  
272 fear conditioning suggested upstream activation of hormone concentration, estrogen receptor  
273 1 (*Esr1*) and dexamethasone-induced pathways with genes for receptors controlling the HPA

274 axis and corticoids like *Mc3r*, *Crhr2*, *Avpr1a* and neuronal inflammation genes like *Lcn-2* (Fig.  
275 5B, Fig. S5A-E).

276 Lipocalin-2 (*Lcn2*) was one of the transcripts downregulated in hippocampi of *Tob*-KO mice.  
277 To confirm this, we performed qRT-PCR, which showed lower mRNA levels in hippocampi  
278 of *Tob*-KO mice for naïve and 15 min post-fear conditioning ( $F_{1,16}=27.4$ ,  $p<0.0001$  for  
279 Genotype effect;  $F_{3,16}=14.22$ ,  $p<0.0001$  for Genotype x time effect; WT vs KO naïve  $p=0.0363$ ,  
280 15 minutes  $p<0.0001$ ) (Fig. 5C). Lower *Lcn2* mRNA levels coincided with lower protein levels,  
281 in which fear conditioning-induced LCN2 protein expression after 15 min was suppressed in  
282 *Tob*-KO mice ( $F_{1,4}=11.67$ ,  $p=0.0269$  for Genotype effect;  $F_{3,12}=5.199$ ,  $p=0.0157$  for Time x  
283 Genotype; WT vs KO 15 minutes  $p=0.0007$ ) (Fig. 5D, 5E). These results show that TOB  
284 contributes to activation of stress-induced LCN2 transcription and subsequent translation.

285 Additionally, fear-induced ERK phosphorylation was inhibited in hippocampi of KO mice after  
286 fear conditioning ( $F_{1,4}=12.6$ ,  $p=0.0238$  for Genotype effect) (Fig. 5F, 5G). On the other hand,  
287 MKP-1 protein levels were elevated in KO mice ( $F_{1,3}=12.25$ ,  $p=0.0395$  for Genotype effect;  
288  $F_{3,9}=5.358$ ,  $p=0.0216$  for Time x Genotype; WT vs KO 1 h  $p=0.0124$ , 3 h  $p=0.0029$ ).  
289 Accordingly, TOB deletion repressed stress-induced ERK phosphorylation and simultaneously  
290 increased MKP-1 protein levels.

291

292

## Discussion

293 Stress vulnerability and resilience differ among individuals, which suggests a strong influence  
294 of genetic factors. However, molecular mechanisms predisposing some individuals to stress-  
295 induced psychiatric disorders are not well explored. Here, we introduce TOB as a  
296 psychological stress-responsive gene that governs synchrony between brain regions that  
297 process emotional regulation. Additionally, *Tob*-deficient mice showed abnormal functional  
298 dynamics in the hippocampus and between the hippocampus and mPFC. Moreover, *Tob*  
299 deletion led to impaired hippocampal excitatory-inhibitory balance, accompanied by increased  
300 AMPAR- and decreased GABAR-mediated synaptic transmission. Additionally, TOB-  
301 deficient mice showed abnormal hippocampal-dependent contextual fear conditioning,  
302 extinction, and depression-like behaviors. *Tob* deletion resulted in abnormal transient  
303 hippocampal transcriptome profiling after fear conditioning in *Tob*-KO mice. Moreover, fear  
304 conditioning-induced *Lcn2* expression was suppressed in *Tob*-KO mice, mostly through the  
305 ERK-mediated pathway.

306 During its initial characterization, TOB was proposed to exhibit a transient response to  
307 stimulation<sup>34</sup>. Interestingly, *Tob* was recently classified as one of the early response genes<sup>18,19</sup>,  
308 possibly due to the presence of three ATTTA motifs in the 3'UTR of the *Tob* gene, which is  
309 commonly observed in immediate early genes<sup>35</sup>. Our results show that hippocampal TOB  
310 levels rapidly increased after acute psychological stress. A similar pattern was observed in  
311 genes involved in the stress machinery pathway, like PAI-1 and tPA<sup>36,37</sup>.

312 Our data show decreased hippocampal-medial-prefrontal functional connectivity in KO mice.  
313 Altered PFC connectivity to other brain regions predisposes depression, while enhancement is  
314 used to evaluate treatment efficiency<sup>38</sup>. Additionally, the mPFC has an inhibitory function in



315 regulating emotional behavior, like reducing fear responses, extinguishing aversive memories,  
316 and suppressing the hypothalamic-pituitary adrenal (HPA) axis<sup>39, 40</sup>. Therefore, decreased  
317 functional connectivity in *Tob*-KO mice suggests a loss of inhibitory emotional control of the  
318 mPFC over the hippocampus. An aberrant increase of hippocampal CA1-DG functional  
319 connectivity in *Tob*-KO mice leads to enhanced synchronization and processing in the  
320 hippocampus. Together with the significant increase in the excitatory-inhibitory ratio, our data  
321 suggest that hippocampal activity is disproportionately increased. This is consistent with reports  
322 of decreased prefrontal and increased hippocampal activity in PTSD and depression patients<sup>41-</sup>  
323 <sup>44</sup>. One limitation to our fMRI analysis is that the amygdala, a central hub regulating emotional  
324 behavior, could not be included due to high noise originating from nearby veins and the air-  
325 filled ear canal<sup>45, 46</sup>. There are reports correlating fMRI with neuronal activity<sup>47</sup>. However, it  
326 was challenging to distinguish between excitatory and inhibitory neuronal activity in our study.  
327 Nonetheless, the change in hippocampal functional connectivity in *Tob*-KO mice suggests a  
328 causative change in neuronal activity. The mPFC is anatomically connected to the  
329 hippocampus through CA1<sup>48</sup>. Therefore, we decided to measure CA1 neuronal activity, as we  
330 speculated that it helps to regulate hippocampal and mPFC-hippocampal connectivity.

331 Our results show that TOB is expressed in the synaptic fraction, suggesting its possible function  
332 in synaptic neurotransmission. This is compatible with a single-cell sequencing study by Qiu  
333 et al. (2020)<sup>18</sup>, which showed a rapid increase in *Tob* expression in excitatory neurons after  
334 neuronal stimulation. Our results from *Tob*-deficient hippocampal slices show increased  
335 AMPAR-mediated and decreased GABAR-mediated neuronal transmission. Interestingly,  
336 increased expression of AMPARs and subsequent neuronal activity were observed in response  
337 to stress<sup>49</sup>. On the other hand, decreased inhibitory neurotransmission is a well-established  
338 etiology for depression, anxiety, and PTSD<sup>50-52</sup>. Also, inhibiting GABAergic neurons in CA1  
339 altered the hippocampal-mPFC neuronal firing synchronization<sup>53</sup>. As expected, TOB-deficient  
340 slices show an elevated excitatory/inhibitory (E/I) ratio. A similar increase in E/I ratio is  
341 observed in stress and depression mouse models<sup>54-56</sup>. Taken together, the observed change in  
342 CA1 neuronal activity of *Tob*-KO mice is strongly linked to the altered functional connectivity  
343 between the hippocampus and prefrontal cortex. Additionally, the altered excitation and  
344 inhibition balance might be a consequence of decreased inhibitory synaptic transmission<sup>50</sup>. One  
345 limitation of our study is that fMRI imaging and electrophysiological recording were done on  
346 naïve non-stressed mice to analyze basal levels. This was necessary to evaluate abnormal  
347 factors leading to altered stress responses. Future measurement of neuronal activity at cellular  
348 and circuit levels after stress would offer more insight on the function of TOB in the brain's  
349 dynamic stress network level.

350 Fear conditioning and extinction have been introduced as a model of PTSD, to assess emotional  
351 behavior in response to aversive stimuli<sup>57</sup>. A stress-induced increase in AMPARs was reported  
352 to enhance fear memory<sup>58, 59</sup>. Therefore, elevated hippocampal neurotransmission can be linked  
353 to the increased contextual fear conditioning and extinction of *Tob*-KO mice. Our rescue and  
354 hippocampal-specific knockout experiments demonstrate that enhanced fear in *Tob*-KO mice  
355 is hippocampal-dependent. Forced swim has been implemented to evaluate the ability to cope  
356 with inescapable stress<sup>60, 61</sup>. *Tob*-KO mice exhibit depression-like behavior when exposed to

357 forced swim, this suggests that TOB may function in efficiently coping with stressors. Such  
358 depression-like behavior is consistent with previously reported low *TOB* mRNA levels in major  
359 depressive disorder (MDD) patients<sup>20</sup>. On the other hand, hippocampus-specific *Tob*-KO did  
360 not induce anxiety, and TOB re-expression in the hippocampus did not reduce it. Therefore,  
361 the increased anxiety in *Tob*-KO mice could be mediated by a brain region other than the  
362 hippocampus. This accords with studies showing that anxiety is mainly regulated by the  
363 amygdala and prefrontal cortex<sup>62</sup>. Taken together, TOB is important for intact hippocampal-  
364 mediated stress coping behaviors, namely fear and depression.

365 How does TOB execute stress-induced molecular functions in the hippocampus? TOB  
366 regulates gene transcription<sup>63, 64</sup>, this likely explains the increase in differentially expressed  
367 genes 15 min after fear conditioning in KO mice when compared to WT. The abnormal changes  
368 in hormone receptor levels of KO mice after fear conditioning suggest the activation of stress-  
369 induced hormonal pathway. *Ttr*, *Crhr2*, *Avpr1a* and *Mc3r* are among the activated genes that  
370 could be involved in this pathway. *Ttr* gene expression is regulated by glucocorticoids and  
371 estradiol<sup>65, 66</sup>. *Crhr2* is activated by Urocotins I, II (stresscopin-related peptide), and III  
372 (stresscopin), which belong to the corticotrophin-releasing factor (CRF)-related peptides<sup>67</sup>.  
373 *Crhr2* expression in the brain has been correlated with fear<sup>68</sup>. Similarly, elevated *Crhr2* was  
374 attributed to an inability to cope with stress, consequently predisposing the individual to PTSD  
375 or suicide<sup>69, 70</sup>. Interestingly, stimulating *Crhr2* with different concentrations of agonist, led to  
376 either activation or inhibition of the HPA axis<sup>71</sup>. *Avpr1a* is another interesting candidate. Its  
377 activation leads to increased fear response and anxiety<sup>72</sup>. Additionally, AVPR1A contributes  
378 to activation of the HPA-axis by increasing ACTH and corticosterone levels<sup>73</sup>. Lastly,  
379 Melanocortin 3 receptor (*Mc3r*) is another candidate activated by melanocortin peptides,  
380 namely alpha, beta, and gamma-melanocyte-stimulating hormones (MSHs) and  
381 adrenocorticotrophic hormone (ACTH)<sup>74</sup>. MC3R activation has been linked to increased  
382 anxiety and stress response<sup>75</sup>. Collectively, the increased mRNA expression of hormone  
383 receptor levels in hippocampi of *Tob*-KO mice after fear conditioning may give rise to  
384 hormone-mediated abnormal behavior, partly through the hyperactivated HPA axis. This might  
385 also be induced by decreased inhibitory neurotransmission, which increases HPA axis  
386 activity<sup>76</sup>, anxiety, and responses to stress<sup>77</sup>.

387 Fear conditioning induced a transient increase in LCN2 expression in hippocampi of WT mice,  
388 which was inhibited by *Tob* deletion. Like *Tob*, *Lcn2* is an acute phase gene<sup>78</sup> that shows  
389 increased hippocampal expression in response to restraint stress<sup>79</sup>. Additionally, LCN2  
390 deletion in mice caused anxious- and depressive-like behaviors<sup>80</sup>, which resemble those of *Tob*-  
391 KO mice. Lower LCN2 expression in TOB-deficient hippocampus can be linked to the  
392 observed increase in CA1 excitatory neurotransmission, as LCN2 deficiency induces  
393 hippocampal neuronal excitability<sup>79</sup>. Therefore, TOB functions in response to stress may be  
394 partially mediated through LCN2. However, until now there has been no evidence showing  
395 any interaction between TOB and LCN2. ERK phosphorylation might be the missing link  
396 between TOB and LCN2. We observed decreased stress-induced ERK phosphorylation in  
397 hippocampus of *Tob*-KO mice. Decreased ERK phosphorylation has been attributed to stress-  
398 induced depression<sup>81</sup>. The interaction between TOB and ERK is bidirectional, in that ERK

399 phosphorylates TOB and TOB impacts ERK phosphorylation<sup>23, 82, 83</sup>. On the other hand, ERK  
400 phosphorylation induces LCN2 expression<sup>84</sup>. Therefore, it is highly suggestive that decreased  
401 LCN2 levels after stress in *Tob*-KO mice are due to altered ERK phosphorylation. One of the  
402 upstream phosphatases controlling ERK phosphorylation is MKP-1, which is overexpressed in  
403 hippocampi of *Tob*-KO mice. This is consistent with previous reports that MKP-1 expression  
404 is induced by cellular stress and acute glucocorticoid treatment<sup>85</sup>, to inactivate MAP kinases  
405 such as ERK<sup>86</sup>.

406 In summary, this study demonstrates increased TOB levels after acute stress and highlights its  
407 function in the hippocampus by maintaining normal fear and depressive behaviors. We also  
408 show that TOB regulates the rapid transcriptional response after acute stress, hippocampal  
409 connectivity, and synaptic transmission. These observations set the stage for future use of TOB  
410 as a stress biomarker or vulnerability predictor for individuals prone to stress.

411

412

## Materials and Methods

### 413 Animals

414 Mice with a C57BL/6J genetic background were used in this study. *Tob*-KO mouse generation  
415 and validation were described by Yoshida et al., 2000<sup>64</sup>. Floxed *Tob* mice (Accession No.  
416 CDB0044E) were generated by insertion of LoxP sequences spanning exon2 of the *Tob* gene  
417 with detailed procedure described in supplementary information. Genotyping to detect  
418 insertion at the 5' end employed primers: FW 5'- TGAGAGCCCTTGGCATGG -3' REV 5'-  
419 ATACCACTTCCCAGCAGG -3' and at 3' end using: FW 5'- GGAATAATGGAAGGCAGG  
420 -3' REV 5'- CCTCCTATCACCTGGCTC -3'. Mice with homozygous LoxP insertions  
421 (Floxed *Tob* mice, *Tob*<sup>fl/fl</sup>) were used for experiments after backcrossing with C57BL/6J mice  
422 for at least 5 generations. All mice were housed under controlled temperature and a 12-h  
423 light/dark cycle. All animal experiments were performed following guidelines for experimental  
424 animals and approved by the Animal Care and Use Committee, Okinawa Institute and Science  
425 Technology Graduate University (OIST), Japan.

426

### 427 Restraint Stress

428 Mice were restrained in 50-mL Falcon centrifuge tubes with conical bottoms (Corning, USA)  
429 for 30 min. Holes were drilled in the tubes to allow respiration, while tube caps had one hole  
430 to let their tails pass through. After restraint stress, mice were returned to their home cages for  
431 indicated times, to be sacrificed for collection of hippocampi for protein extraction.

432

### 433 Inescapable electric shock

434 Mice were exposed inescapable electric shocks as described in the training procedure for “Fear  
435 Conditioning and Extinction”, and then returned to their home cages until sacrifice and  
436 collection of hippocampi at the indicated times.

437

## 438 **Western blotting**

439 Hippocampal tissues were lysed using ice-cold lysis buffer containing 0.3% SDS, 1.67% Triton  
440 X-100, 50 mM Tris-HCl pH7.4, 150 mM NaCl, 1 mM EDTA, 1 mM EGTA, 10% glycerol,  
441 Halt Protease inhibitor cocktail (ThermoFisher, USA), and phosphatase inhibitor cocktail  
442 PhosSTOP (Roche, Switzerland). Synaptic fractionation was done following a detailed  
443 published protocol<sup>87</sup>. Electrophoresis was performed using 7.5 or 12% TGX Acrylamide gels  
444 (Bio-rad, USA) following standard protocols. Proteins were transferred to PVDF membranes  
445 using Trans-Blot Turbo Transfer (Bio-Rad, USA) and blocked in TBS buffer containing 5%  
446 BSA and 0.1% Tween-20. Antibodies were diluted in Can Get Signal immunoreaction  
447 enhancer solution (Toyobo, Japan) and incubated according to the manufacturer's protocol.  
448 Antibodies used were anti-Tob mouse monoclonal antibody as described by Matsuda et al.,  
449 1996, anti-Tob rabbit polyclonal antibody (RpAb) (Sigma-Adrich, USA), anti-ERK1/2 rabbit  
450 monoclonal antibody, anti-(p-ERK1/2) RpAb, anti-Cre RpAb (Cell Signaling, USA), anti-  
451 MKP-1 RpAb (Santa Cruz, USA), anti-LCN2 goat polyclonal antibody (R&D systems, USA).  
452 Chemiluminescent signals were generated using Immobilon (Millipore, USA) and detected  
453 using ImageQuant LAS4000 (GE healthcare, USA). For reprobing, Restore Plus stripping  
454 buffer (ThermoFisher, USA) was used. Band intensities were quantified using Image Studio  
455 Lite software (Li-Cor, USA). Automated Simple Wes system was used to quantify ERK  
456 phosphorylation levels, according to the manufacturer's instructions using the 12–230 kDa  
457 separation module and anti-rabbit detection module (ProteinSimple, USA).

458

## 459 **Functional magnetic resonance imaging (fMRI)**

460 Detailed head-fixation bar mounting surgery and MRI imaging procedures are described in the  
461 supplementary information.

462

## 463 **Functional connectivity analysis**

464 The pre-processed and denoised time series data were used for a seed-based FC analysis with  
465 CONN17. Regions of interest (ROIs) including CA1, DG and mPFC were chosen. Seed-based  
466 functional connectivity (FC) analysis was performed to compare FC between the Tob-KO  
467 group and the control group. Seed-based FC analysis was composed of two steps. First,  
468 Pearson's correlation between a time series of an average seed ROI and each voxel in images  
469 was calculated, and regional clusters were formed by thresholding statistical significance  
470 (uncorrected p-value < 0.001) between two groups. In the second step, formed clusters were  
471 further statistically corrected with a positive false discovery rate (pFDR;  $p < 0.05$ ).

472

## 473 **Electrophysiological recording**

474 Electrophysiological recordings were performed as described by Etherton et al.<sup>88</sup> and are  
475 detailed in the Supplementary materials and methods.

476

## 477 **Quantitative real-time PCR**

478 Total RNA was extracted from mouse hippocampi using Isogen II (Nippon Gene, Japan)  
479 following the manufacturer's protocol. Reverse transcription was performed using PrimeScript  
480 II 1st strand cDNA Synthesis Kit (Takara, Japan) following the manufacturer's protocol. Real-  
481 time PCR was performed using TB Green Premix Ex Taq II (Takara, Japan) and ViiA7 Real-  
482 Time PCR system (Applied Biosystems, USA). Relative mRNA expression was determined  
483 by the  $\Delta\Delta CT$  method and *Gapdh* mRNA levels were used for normalization. Primers used  
484 were:

485 *Gapdh* FWD 5'- ctgcaccaccaactgcttag -3' REV 5'- gtcttctgggtggcagtgat -3'; *Lcn2* FWD 5'-  
486 ccccatctctgctcactgtc -3' REV 5'- ttttctggaccgcattg -3'; *Crhr2* FWD 5'- aagctgggtgatttggggac -  
487 3' REV 5'-ggtgatgctcgttaacttcg -3'; *Avpr1a* FWD 5'- gctggcggtgatttctgtg -3' REV 5'-  
488 gcaaacacctgcaagtgtc -3'; *Mc3r* FWD 5'- tccgatgctgcctaacctct -3' REV 5'-  
489 ggatgtttccatcagactgacg -3'; *Ttr* FWD 5'- agcccttgcctctgggaaga -3' REV 5'-  
490 tgcgatggtgtagtggcgatgg -3'.

491

## 492 RNA sequencing

493 Intact poly(A) RNA was purified from 1  $\mu$ g of total RNA using a NEBNext® Poly(A) mRNA  
494 Magnetic Isolation Module (New England Biolabs, USA) and following the manufacturer's  
495 protocol. Library preparation was performed using NEBNext® Ultra II Directional RNA  
496 Library Prep Kits for Illumina (New England Biolabs, USA), according to the manufacturer's  
497 protocol with 8 PCR cycles. Library sizes were checked using microfluidic-based  
498 electrophoresis LabChip GX Touch (Perkin Elmer, USA) and concentrations were checked  
499 using Qubit 1X dsDNA HS (ThermoFisher, USA) and then pooled after concentration  
500 adjustment. 150-bp paired-end RNA sequencing was performed using a NovaSeq 6000 SP flow  
501 cell (Illumina, USA).

502 Analysis was done using fastq files containing paired-end sequencing reads and analyzed using  
503 nf-core/rnaseq pipeline v2.0<sup>89</sup>, which were mapped to the GRCm38 genome database using  
504 STAR aligner (v2.6.1d)<sup>90</sup>. Mapped genes were then further analyzed using OmicsBox software  
505 (v1.4.11) for counting using HTSeq (v0.9.0)<sup>91</sup> and differential gene expression analysis using  
506 the package EdgeR (v3.11)<sup>92</sup>. Reads were normalized using the Trimmed Mean of M-values  
507 (TMM) normalization method and a cut-off of at least 0.2 counts per million (CPM) in two  
508 samples was selected. Differentially expressed genes (DEGs) were statistically tested using  
509 EdgeR's exact test, and genes with  $FDR \leq 0.05$ ,  $p\text{-value} \leq 0.05$  and fold change (FC)  $\geq 2$  or  $\leq -2$   
510 were used for further analysis. Pathway analysis was performed for genes 2-fold up- or down-  
511 regulated with  $p\text{-value} < 0.05$  using Ingenuity Pathway Analysis (IPA) software (Qiagen, USA).

512 Raw and pre-processed transcriptomic data files described in the current study are publicly  
513 available in NCBI GEO under accession number GSE186101.

514

## 515 Behavior

516 Behavioral analyses were performed using male mice 8-12 weeks old. All experiments were  
517 performed by experimenters blinded to genotype during testing. All software for analysis was

518 from O'Hara & Co Ltd., which has been modified in the public domain (National Institutes of  
519 Health (NIH) Image J program).

520

### 521 **Fear Conditioning and extinction**

522 Fear conditioning and extinction were performed as described previously by Pibiri et al., 2008<sup>93</sup>  
523 with minor modifications. Briefly, on training day, mice were placed in a conditioning chamber  
524 (CL-3002L, O'Hara & Co Ltd., Japan) for 2 min to habituate, and then presented with a  
525 conditioning stimulus (CS) of a 65-dB tone for 30 s, co-terminated with an unconditioned  
526 stimulus (US) of 0.5 mA, a 2-s foot shock. The tone and foot shock were repeated 3 times at  
527 2-min intervals. Mice were returned to their home cages 30 s after the last shock. During the  
528 contextual fear test (Day 1), mice were placed in the chamber for 5 min without any tone or  
529 shock presentation. During cued fear conditioning, mice were placed in a novel chamber for 6  
530 min and allowed to explore then presented with a tone for 3 min. Then contextual fear  
531 extinction was tested by placing the mice for 5 min in the same context used for CS-US  
532 conditioning for 5 consecutive days (Days 2-6) with no tone or shock presentation. Freezing  
533 was recorded during each test and analyzed using Image FZC 2.22 sr2 software (O'Hara & Co  
534 Ltd., Japan).

535

### 536 **Forced swim test**

537 The forced swim test was performed as described by Inoue et al. 2008<sup>94</sup>. Briefly, mice were  
538 placed in water-filled cylinder for 10 min. Immobility was recorded and analyzed starting from  
539 the third minute using Time software (O'Hara & Co Ltd., Japan).

540

### 541 **Elevated-plus maze test**

542 The maze consisted of two open and two closed arms with dimensions (25 cm length \* 5 cm  
543 width), which were elevated 50 cm above the floor. Mice were placed in the center region  
544 facing one of the open arms and allowed to move freely for 10 min. Time spent in open arms  
545 was recorded and analyzed using Time EPC software (O'Hara & Co Ltd., Japan).

546

### 547 **Open field test**

548 Mice were placed in the center of an open field arena with dimensions (50 \* 50 \* 33.3 cm;  
549 width, depth and height) and 100 lux illumination intensity and allowed to freely move for 15  
550 min. Movement traces, speed, distance travelled, and time spent in the center of the open field  
551 were recorded and analyzed using Time OFCR software (O'Hara & Co Ltd., Japan).

552

### 553 **Tail suspension test**

554 Mice were suspended by their tails for 6 min. Immobility duration was recorded and analyzed  
555 using Time software (O'Hara & Co Ltd., Japan).

556

### 557 **Adeno-Associated Virus (AAV) production**

558 AAV serotype 9 expressing mouse *Tob* under control of the human synapsin promoter (hSyn)  
559 was generated as described by Kudo et al., 2020<sup>95</sup>. Briefly, pAAV2-hSyn-mTob was generated  
560 from pAAV2-hSyn-EGFP (Addgene, USA) by replacing the EGFP sequence with mouse *Tob*  
561 coding sequence. AAV-293 cells (Agilent, USA) were transfected with AAV-rep2/cap9  
562 expression plasmids, adenovirus helper plasmids, and AAV-vector plasmids to generate  
563 AAV9-hSyn-mTob.

564

### 565 **Stereotactic surgery for viral injection**

566 *Tob*<sup>fl/fl</sup> mice were bilaterally injected with Cre-expressing adeno-associated virus  
567 AAV1.hSyn.Cre.WPRE.hGH (105553-AAV1, Addgene) to generate hippocampus-specific  
568 KO mice. *Tob*-WT and KO mice were injected with AAV to express mouse TOB  
569 AAV9.hSyn.mTob.WPRE.hGH for rescue experiments. Stereotaxic surgical procedures were  
570 performed as described by Augustinaite and Kuhn, 2020<sup>96</sup>. Briefly, mice were anesthetized  
571 using an intraperitoneal injection of a mixture of Medetomidine (0.3 microgram/g), Midazolam  
572 (5 µg/g) and butorphanol (5 µg/g). Additionally, a non-steroidal anti-inflammatory, Carprofen  
573 (7.5 µg/g), was injected by the end of the surgery. Mice were fixed on a stereotaxic frame and  
574 head hair was shaved. A 2% lidocaine solution was applied to the shaved skin and left for 2  
575 min. Iodine was applied gently over the skin as an antiseptic. A midline incision was made,  
576 and skin was retracted, and the skull was exposed. After drying the surface, the bregma was  
577 detected. A micromanipulator was used to slowly move the injection needle to the target  
578 injection site. A dental drill was used to drill a small hole, until the surface of the brain appeared.  
579 A needle with viral solutions of around 300 nL was slowly advanced into the hole until it  
580 touched the brain surface, and slowly lowered to the target coordinates. Injection was done  
581 over 2 min and thereafter, the needle was left in place for 5 min before slowly retracting it.  
582 Coordinates used for the CA1 region of the hippocampus were tested and optimized as 1.6 mm  
583 posterior, 1.5 mm medio-lateral and 1.6 mm ventral to the bregma.

584

### 585 **Immunohistochemistry**

586 Immunohistochemical staining was performed as described by Matsuura et al., 2021<sup>97</sup>.  
587 Antibodies used were Anti-Cre RpAb (Cell Signaling, USA) and Alexa Flour 488 Goat Anti-  
588 rabbit IgG (Invitrogen, USA).

589

### 590 **Statistical analysis**

591 All data are presented as means ± SEMs. T-tests, Mann-Whitney U test, one-way ANOVA,  
592 and two-way ANOVA were used as described in figure legends. Multiple testing following  
593 ANOVA was corrected using Bonferroni or Dunnet's post-hoc tests. GraphPad prism 9 was  
594 used to perform all statistical analyses.

595

## 596 **Acknowledgments**

597 This work was financially supported by Okinawa Institute of Science and Technology Graduate  
598 University and JSPS Kakenhi Grant number 18J20551. We thank Prof. Yoko Yazaki-  
599 Sugiyama and Dr. Yuichi Morohashi for their support in generating Tob AAV viral vectors.  
600 pAAV-hSyn-EGFP was a gift from Bryan Roth (Addgene plasmid # 50465), pAdDeltaF6,  
601 pAAV2/9n, pENN.AAV.hSyn.Cre.WPRE.hGH were gifts from James M. Wilson (Addgene  
602 plasmid # 112867, 112865, Addgene viral prep # 105553-AAV1). Illustrative figures were  
603 created with Biorender.com. We are grateful for the help and support provided by the animal  
604 resources, high-performance computing, and sequencing sections of the Research Support  
605 Division at Okinawa Institute of Science and Technology Graduate University.

606

## 607 **Conflicts of interest**

608 The authors declare **No** conflicts of interest.

609

## 610 **Author Contributions:**

611 MY and TY conceived the idea and coordinated the study. MY performed the behavioral  
612 experiments, molecular experiments and bioinformatic analyses. HH performed fMRI. EL  
613 performed electrophysiological recording. ME and BK performed stereotaxic surgery and viral  
614 injections. YK performed elevated-plus maze and provided support for behavioral analysis.  
615 HK and KN generated Tob<sup>fl/+</sup> mice. MY, EL, HH, ME and TY participated in manuscript  
616 writing. All authors revised and approved the final version of manuscript.

617

## 618 **Supplementary information:**

619 Supplementary information is available at journal's website.

620



## References

- 621  
622
- 623 1. Kessler RC. THE EFFECTS OF STRESSFUL LIFE EVENTS ON DEPRESSION. *Annual Review*  
624 *of Psychology* 1997; **48**(1): 191-214.  
625
  - 626 2. Cohen S, Janicki-Deverts D, Miller GE. Psychological stress and disease. *JAMA* 2007;  
627 **298**(14): 1685-1687.  
628
  - 629 3. McEwen BS. The neurobiology of stress: from serendipity to clinical relevance. *Brain*  
630 *Res* 2000; **886**(1-2): 172-189.  
631
  - 632 4. Sapolsky RM. Stress and the brain: individual variability and the inverted-U. *Nat*  
633 *Neurosci* 2015; **18**(10): 1344-1346.  
634
  - 635 5. Chattarji S, Tomar A, Suvrathan A, Ghosh S, Rahman MM. Neighborhood matters:  
636 divergent patterns of stress-induced plasticity across the brain. *Nat Neurosci* 2015;  
637 **18**(10): 1364-1375.  
638
  - 639 6. Miyagi T, Oishi N, Kobayashi K, Ueno T, Yoshimura S, Murai T *et al.* Psychological  
640 resilience is correlated with dynamic changes in functional connectivity within the  
641 default mode network during a cognitive task. *Scientific Reports* 2020; **10**(1).  
642
  - 643 7. Zhang W, Hashemi MM, Kaldewaij R, Koch SBJ, Beckmann C, Klumpers F *et al.* Acute  
644 stress alters the 'default' brain processing. *Neuroimage* 2019; **189**: 870-877.  
645
  - 646 8. McEwen BS, Nasca C, Gray JD. Stress Effects on Neuronal Structure: Hippocampus,  
647 Amygdala, and Prefrontal Cortex. *Neuropsychopharmacology* 2016; **41**(1): 3-23.  
648
  - 649 9. De Miguel Z, Vegas O, Garmendia L, Arregi A, Beitia G, Azpiroz A. Behavioral coping  
650 strategies in response to social stress are associated with distinct neuroendocrine,  
651 monoaminergic and immune response profiles in mice. *Behavioural Brain Research*  
652 2011; **225**(2): 554-561.  
653
  - 654 10. Girgenti MJ, Pothula S, Newton SS. Stress and Its Impact on the Transcriptome. *Biol*  
655 *Psychiatry* 2021; **90**(2): 102-108.  
656
  - 657 11. Gray JD, Rubin TG, Hunter RG, McEwen BS. Hippocampal gene expression changes  
658 underlying stress sensitization and recovery. *Mol Psychiatry* 2014; **19**(11): 1171-  
659 1178.  
660
  - 661 12. Sannino G, Pasqualini L, Ricciardelli E, Montilla P, Soverchia L, Ruggeri B *et al.* Acute  
662 stress enhances the expression of neuroprotection- and neurogenesis-associated  
663 genes in the hippocampus of a mouse restraint model. *Oncotarget* 2016; **7**(8): 8455-  
664 8465.  
665
  - 666 13. Flati T, Gioiosa S, Chillemi G, Mele A, Oliverio A, Mannironi C *et al.* A gene expression  
667 atlas for different kinds of stress in the mouse brain. *Sci Data* 2020; **7**(1): 437.

- 668  
669 14. Lim CP, Jain N, Cao X. Stress-induced immediate-early gene, *egr-1*, involves  
670 activation of p38/JNK1. *Oncogene* 1998; **16**(22): 2915-2926.  
671
- 672 15. Duclot F, Kabbaj M. The Role of Early Growth Response 1 (EGR1) in Brain Plasticity  
673 and Neuropsychiatric Disorders. *Front Behav Neurosci* 2017; **11**: 35.  
674
- 675 16. Jin M, Wang XM, Tu Y, Zhang XH, Gao X, Guo N *et al*. The negative cell cycle  
676 regulator, Tob (transducer of ErbB-2), is a multifunctional protein involved in  
677 hippocampus-dependent learning and memory. *Neuroscience* 2005; **131**(3): 647-659.  
678
- 679 17. Wang XM, Gao X, Zhang XH, Tu YY, Jin ML, Zhao GP *et al*. The negative cell cycle  
680 regulator, Tob (transducer of ErbB-2), is involved in motor skill learning. *Biochem*  
681 *Biophys Res Commun* 2006; **340**(4): 1023-1027.  
682
- 683 18. Qiu Q, Hu P, Qiu XJ, Govek KW, Camara PG, Wu H. Massively parallel and time-  
684 resolved RNA sequencing in single cells with scNT-seq. *Nat Methods* 2020; **17**(10):  
685 991+.
- 686
- 687 19. Arloth J, Bogdan R, Weber P, Frishman G, Menke A, Wagner KV *et al*. Genetic  
688 Differences in the Immediate Transcriptome Response to Stress Predict Risk-Related  
689 Brain Function and Psychiatric Disorders. *Neuron* 2015; **86**(5): 1189-1202.  
690
- 691 20. Kerman IA, Bernard R, Bonney WE, Jones EG, Schatzberg AE, Myers RM *et al*.  
692 Evidence for transcriptional factor dysregulation in the dorsal raphe nucleus of  
693 patients with major depressive disorder. *Front Neurosci-Switz* 2012; **6**.  
694
- 695 21. Suzuki T, Tsuzuku J, Kawakami K, Miyasaka T, Yamamoto T. Proteasome-mediated  
696 degradation of Tob is pivotal for triggering UV-induced apoptosis. *Oncogene* 2009;  
697 **28**(3): 401-411.  
698
- 699 22. Lee HS, Kundu J, Kim RN, Shin YK. Transducer of *erbB2*. 1 (*tob1*) as a tumor  
700 suppressor: A mechanistic perspective. *International journal of molecular sciences*  
701 2015; **16**(12): 29815-29828.  
702
- 703 23. Che J, Lu YW, Sun KK, Feng C, Dong AJ, Jiao Y. Overexpression of TOB1 confers  
704 radioprotection to bronchial epithelial cells through the MAPK/ERK pathway. *Oncol*  
705 *Rep* 2013; **30**(2): 637-642.  
706
- 707 24. Usui M, Yoshida Y, Yamashita T, Tsuji K, Ishikawa I, Yamamoto T *et al*. Enhancing  
708 effect of Tob deficiency on bone formation is specific to bone morphogenetic  
709 protein-induced osteogenesis. *J Bone Miner Res* 2002; **17**(6): 1026-1033.  
710
- 711 25. Saito A, Ochiai K, Kondo S, Tsumagari K, Murakami T, Cavener DR *et al*. Endoplasmic  
712 reticulum stress response mediated by the PERK-eIF2(alpha)-ATF4 pathway is  
713 involved in osteoblast differentiation induced by BMP2. *J Biol Chem* 2011; **286**(6):  
714 4809-4818.

- 715  
716 26. Schulze-Topphoff U, Casazza S, Varrin-Doyer M, Pekarek K, Sobel RA, Hauser SL *et al.*  
717 Tob1 plays a critical role in the activation of encephalitogenic T cells in CNS  
718 autoimmunity. *Journal of Experimental Medicine* 2013; jem. 20121611.  
719
- 720 27. Corvol J-C, Pelletier D, Henry RG, Caillier SJ, Wang J, Pappas D *et al.* Abrogation of T  
721 cell quiescence characterizes patients at high risk for multiple sclerosis after the  
722 initial neurological event. *Proceedings of the National Academy of Sciences* 2008;  
723 **105**(33): 11839-11844.  
724
- 725 28. Rosenberg T, Gal-Ben-Ari S, Dieterich DC, Kreutz MR, Ziv NE, Gundelfinger ED *et al.*  
726 The roles of protein expression in synaptic plasticity and memory consolidation.  
727 *Front Mol Neurosci* 2014; **7**: 86.  
728
- 729 29. Buynitsky T, Mostofsky DI. Restraint stress in biobehavioral research: Recent  
730 developments. *Neuroscience & Biobehavioral Reviews* 2009; **33**(7): 1089-1098.  
731
- 732 30. Bali A, Jaggi AS. Electric foot shock stress: a useful tool in neuropsychiatric studies.  
733 *Rev Neurosci* 2015; **26**(6): 655-677.  
734
- 735 31. Kim EJ, Pellman B, Kim JJ. Stress effects on the hippocampus: a critical review. *Learn*  
736 *Mem* 2015; **22**(9): 411-416.  
737
- 738 32. Myers KM, Davis M. Mechanisms of fear extinction. *Mol Psychiatry* 2007; **12**(2): 120-  
739 150.  
740
- 741 33. Commons KG, Cholanians AB, Babb JA, Ehlinger DG. The Rodent Forced Swim Test  
742 Measures Stress-Coping Strategy, Not Depression-like Behavior. *ACS Chem Neurosci*  
743 2017; **8**(5): 955-960.  
744
- 745 34. Matsuda S, KawamuraTsuZuku J, Ohsugi M, Yoshida M, Emi M, Nakamura Y *et al.*  
746 Tob, a novel protein that interacts with p185(erbB2), is associated with  
747 antiproliferative activity. *Oncogene* 1996; **12**(4): 705-713.  
748
- 749 35. Yoshida Y, Matsuda S, Yamamoto T. Cloning and characterization of the mouse tob  
750 gene. *Gene* 1997; **191**(1): 109-113.  
751
- 752 36. Bouarab C, Roullot-Lacarrière V, Vallée M, Le Roux A, Guette C, Mennesson M *et al.*  
753 PAI-1 protein is a key molecular effector in the transition from normal to PTSD-like  
754 fear memory. *Molecular Psychiatry* 2021.  
755
- 756 37. Pawlak R, Magarinos AM, Melchor J, McEwen B, Strickland S. Tissue plasminogen  
757 activator in the amygdala is critical for stress-induced anxiety-like behavior. *Nature*  
758 *Neuroscience* 2003; **6**(2): 168-174.  
759

- 760 38. Abdallah CG, Averill LA, Collins KA, Geha P, Schwartz J, Averill C *et al.* Ketamine  
761 Treatment and Global Brain Connectivity in Major Depression.  
762 *Neuropsychopharmacology* 2017; **42**(6): 1210-1219.  
763
- 764 39. Morgan MA, Romanski LM, LeDoux JE. Extinction of emotional learning: contribution  
765 of medial prefrontal cortex. *Neurosci Lett* 1993; **163**(1): 109-113.  
766
- 767 40. Liberzon I, King AP, Britton JC, Phan KL, Abelson JL, Taylor SF. Paralimbic and medial  
768 prefrontal cortical involvement in neuroendocrine responses to traumatic stimuli.  
769 *Am J Psychiatry* 2007; **164**(8): 1250-1258.  
770
- 771 41. Qin S, Hermans EJ, van Marle HJ, Luo J, Fernandez G. Acute psychological stress  
772 reduces working memory-related activity in the dorsolateral prefrontal cortex. *Biol*  
773 *Psychiatry* 2009; **66**(1): 25-32.  
774
- 775 42. Thomaes K, Dorrepaal E, Draijer NP, de Rooter MB, Elzinga BM, van Balkom AJ *et al.*  
776 Increased activation of the left hippocampus region in Complex PTSD during  
777 encoding and recognition of emotional words: a pilot study. *Psychiatry Res* 2009;  
778 **171**(1): 44-53.  
779
- 780 43. Werner NS, Meindl T, Engel RR, Rosner R, Riedel M, Reiser M *et al.* Hippocampal  
781 function during associative learning in patients with posttraumatic stress disorder. *J*  
782 *Psychiatr Res* 2009; **43**(3): 309-318.  
783
- 784 44. Hao ZY, Zhong Y, Ma ZJ, Xu HZ, Kong JY, Wu Z *et al.* Abnormal resting-state functional  
785 connectivity of hippocampal subfields in patients with major depressive disorder.  
786 *BMC Psychiatry* 2020; **20**(1): 71.  
787
- 788 45. Boubela RN, Kalcher K, Huf W, Seidel EM, Derntl B, Pezawas L *et al.* fMRI  
789 measurements of amygdala activation are confounded by stimulus correlated signal  
790 fluctuation in nearby veins draining distant brain regions. *Sci Rep* 2015; **5**: 10499.  
791
- 792 46. Li R, Liu X, Sidabras JW, Paulson ES, Jesmanowicz A, Nencka AS *et al.* Restoring  
793 susceptibility induced MRI signal loss in rat brain at 9.4 T: A step towards whole  
794 brain functional connectivity imaging. *PLoS One* 2015; **10**(4): e0119450.  
795
- 796 47. Heeger DJ, Ress D. What does fMRI tell us about neuronal activity? *Nature Reviews*  
797 *Neuroscience* 2002; **3**(2): 142-151.  
798
- 799 48. Jin J, Maren S. Prefrontal-Hippocampal Interactions in Memory and Emotion. *Front*  
800 *Syst Neurosci* 2015; **9**: 170.  
801
- 802 49. Whitehead G, Jo J, Hogg EL, Piers T, Kim DH, Seaton G *et al.* Acute stress causes rapid  
803 synaptic insertion of Ca<sup>2+</sup>-permeable AMPA receptors to facilitate long-term  
804 potentiation in the hippocampus. *Brain* 2013; **136**(Pt 12): 3753-3765.  
805

- 806 50. Luscher B, Fuchs T. GABAergic Control of Depression-Related Brain States. *Diversity*  
807 *and Functions of GABA Receptors: A Tribute to Hanns Möhler, Part B*2015, pp 97-144.  
808
- 809 51. Ren Z, Pribiag H, Jefferson SJ, Shorey M, Fuchs T, Stellwagen D *et al.* Bidirectional  
810 Homeostatic Regulation of a Depression-Related Brain State by Gamma-  
811 Aminobutyric Acidergic Deficits and Ketamine Treatment. *Biol Psychiatry* 2016;  
812 **80**(6): 457-468.  
813
- 814 52. Kaufman J, Plotsky PM, Nemeroff CB, Charney DS. Effects of early adverse  
815 experiences on brain structure and function: clinical implications. *Biol Psychiatry*  
816 2000; **48**(8): 778-790.  
817
- 818 53. Xia F, Richards BA, Tran MM, Josselyn SA, Takehara-Nishiuchi K, Frankland PW.  
819 Parvalbumin-positive interneurons mediate neocortical-hippocampal interactions  
820 that are necessary for memory consolidation. *Elife* 2017; **6**.  
821
- 822 54. Shi MM, Fan KM, Qiao YN, Xu JH, Qiu LJ, Li X *et al.* Hippocampal micro-opioid  
823 receptors on GABAergic neurons mediate stress-induced impairment of memory  
824 retrieval. *Mol Psychiatry* 2020; **25**(5): 977-992.  
825
- 826 55. Fee C, Banasr M, Sibille E. Somatostatin-Positive Gamma-Aminobutyric Acid  
827 Interneuron Deficits in Depression: Cortical Microcircuit and Therapeutic  
828 Perspectives. *Biol Psychiatry* 2017; **82**(8): 549-559.  
829
- 830 56. Luscher B, Shen Q, Sahir N. The GABAergic deficit hypothesis of major depressive  
831 disorder. *Mol Psychiatry* 2011; **16**(4): 383-406.  
832
- 833 57. Rau V, DeCola JP, Fanselow MS. Stress-induced enhancement of fear learning: an  
834 animal model of posttraumatic stress disorder. *Neurosci Biobehav Rev* 2005; **29**(8):  
835 1207-1223.  
836
- 837 58. Hu H, Real E, Takamiya K, Kang MG, Ledoux J, Huganir RL *et al.* Emotion enhances  
838 learning via norepinephrine regulation of AMPA-receptor trafficking. *Cell* 2007;  
839 **131**(1): 160-173.  
840
- 841 59. Groc L, Choquet D, Chaouloff F. The stress hormone corticosterone conditions  
842 AMPAR surface trafficking and synaptic potentiation. *Nat Neurosci* 2008; **11**(8): 868-  
843 870.  
844
- 845 60. Molendijk ML, de Kloet ER. Coping with the forced swim stressor: Current state-of-  
846 the-art. *Behav Brain Res* 2019; **364**: 1-10.  
847
- 848 61. de Kloet ER, Molendijk ML. Coping with the Forced Swim Stressor: Towards  
849 Understanding an Adaptive Mechanism. *Neural Plast* 2016; **2016**: 6503162.  
850

- 851 62. Liu WZ, Zhang WH, Zheng ZH, Zou JX, Liu XX, Huang SH *et al.* Identification of a  
852 prefrontal cortex-to-amygdala pathway for chronic stress-induced anxiety. *Nat*  
853 *Commun* 2020; **11**(1): 2221.  
854
- 855 63. Yoshida Y, Nakamura T, Komoda M, Satoh H, Suzuki T, Tsuzuku JK *et al.* Mice lacking  
856 a transcriptional corepressor Tob are predisposed to cancer. *Genes & Development*  
857 2003; **17**(10): 1201-1206.  
858
- 859 64. Yoshida Y, Tanaka S, Umemori H, Minowa O, Usui M, Ikematsu N *et al.* Negative  
860 regulation of BMP/Smad signaling by Tob in osteoblasts. *Cell* 2000; **103**(7): 1085-  
861 1097.  
862
- 863 65. Li X, Masliah E, Reixach N, Buxbaum JN. Neuronal production of transthyretin in  
864 human and murine Alzheimer's disease: is it protective? *J Neurosci* 2011; **31**(35):  
865 12483-12490.  
866
- 867 66. Martinho A, Goncalves I, Costa M, Santos CR. Stress and glucocorticoids increase  
868 transthyretin expression in rat choroid plexus via mineralocorticoid and  
869 glucocorticoid receptors. *J Mol Neurosci* 2012; **48**(1): 1-13.  
870
- 871 67. Reul JM, Holsboer F. On the role of corticotropin-releasing hormone receptors in  
872 anxiety and depression. *Dialogues Clin Neurosci* 2002; **4**(1): 31-46.  
873
- 874 68. Koorneef LL, Bogaards M, Reinders MJT, Meijer OC, Mahfouz A. How Metabolic State  
875 May Regulate Fear: Presence of Metabolic Receptors in the Fear Circuitry. *Front*  
876 *Neurosci-Switz* 2018; **12**.  
877
- 878 69. Hiroi N, Wong ML, Licinio J, Park C, Young M, Gold PW *et al.* Expression of  
879 corticotropin releasing hormone receptors type I and type II mRNA in suicide victims  
880 and controls. *Mol Psychiatry* 2001; **6**(5): 540-546.  
881
- 882 70. Toth M, Flandreau EI, Deslauriers J, Geyer MA, Mansuy IM, Merlo Pich E *et al.*  
883 Overexpression of Forebrain CRH During Early Life Increases Trauma Susceptibility in  
884 Adulthood. *Neuropsychopharmacology* 2016; **41**(6): 1681-1690.  
885
- 886 71. Bagosi Z, Csabafi K, Palotai M, Jaszberenyi M, Foldesi I, Gardi J *et al.* The interaction  
887 of Urocortin II and Urocortin III with amygdalar and hypothalamic corticotropin-  
888 releasing factor (CRF)--reflections on the regulation of the hypothalamic-pituitary-  
889 adrenal (HPA) axis. *Neuropeptides* 2013; **47**(5): 333-338.  
890
- 891 72. Carter CS. The Oxytocin-Vasopressin Pathway in the Context of Love and Fear. *Front*  
892 *Endocrinol (Lausanne)* 2017; **8**: 356.  
893
- 894 73. Zhu J, Chen Z, Zhu L, Meng Z, Wu G, Tian Z. Arginine Vasopressin and Arginine  
895 Vasopressin Receptor 1b Involved in Electroacupuncture-Attenuated Hypothalamic-  
896 Pituitary-Adrenal Axis Hyperactivity in Hepatectomy Rats. *Neuromodulation* 2016;  
897 **19**(5): 498-506.

- 898  
899 74. Bertolini A, Tacchi R, Vergoni A. Brain effects of melanocortins☆. *Pharmacological*  
900 *Research* 2009; **59**(1): 13-47.  
901  
902 75. Gogas KR, Lechner SM, Markison S, Williams JP, McCarthy W, Grigoriadis DE *et al.*  
903 6.04 - Anxiety. In: Taylor JB, Triggle DJ (eds). *Comprehensive Medicinal Chemistry II.*  
904 Elsevier: Oxford, 2007, pp 85-115.  
905  
906 76. Shen Q, Lal R, Luellen BA, Earnheart JC, Andrews AM, Luscher B. gamma-  
907 Aminobutyric acid-type A receptor deficits cause hypothalamic-pituitary-adrenal axis  
908 hyperactivity and antidepressant drug sensitivity reminiscent of melancholic forms  
909 of depression. *Biol Psychiatry* 2010; **68**(6): 512-520.  
910  
911 77. Crestani F, Lorez M, Baer K, Essrich C, Benke D, Laurent JP *et al.* Decreased GABAA-  
912 receptor clustering results in enhanced anxiety and a bias for threat cues. *Nat*  
913 *Neurosci* 1999; **2**(9): 833-839.  
914  
915 78. Liu Q, Nilsen-Hamilton M. Identification of a new acute phase protein. *J Biol Chem*  
916 1995; **270**(38): 22565-22570.  
917  
918 79. Mucha M, Skrzypiec AE, Schiavon E, Attwood BK, Kucerova E, Pawlak R. Lipocalin-2  
919 controls neuronal excitability and anxiety by regulating dendritic spine formation  
920 and maturation. *Proc Natl Acad Sci U S A* 2011; **108**(45): 18436-18441.  
921  
922 80. Ferreira AC, Pinto V, Da Mesquita S, Novais A, Sousa JC, Correia-Neves M *et al.*  
923 Lipocalin-2 is involved in emotional behaviors and cognitive function. *Front Cell*  
924 *Neurosci* 2013; **7**: 122.  
925  
926 81. Dwivedi Y, Zhang H. Altered ERK1/2 Signaling in the Brain of Learned Helpless Rats:  
927 Relevance in Vulnerability to Developing Stress-Induced Depression. *Neural Plast*  
928 2016; **2016**: 7383724.  
929  
930 82. Maekawa M, Nishida E, Tanoue T. Identification of the anti-proliferative protein Tob  
931 as a MAPK substrate. *Journal of Biological Chemistry* 2002; **277**(40): 37783-37787.  
932  
933 83. Suzuki T, K-Tsuzuku J, Ajima R, Nakamura T, Yoshida Y, Yamamoto T. Phosphorylation  
934 of three regulatory serines of Tob by Erk1 and Erk2 is required for Ras-mediated cell  
935 proliferation and transformation. *Genes & Development* 2002; **16**(11): 1356-1370.  
936  
937 84. Du ZP, Wu BL, Xie YM, Zhang YL, Liao LD, Zhou F *et al.* Lipocalin 2 promotes the  
938 migration and invasion of esophageal squamous cell carcinoma cells through a novel  
939 positive feedback loop. *Biochim Biophys Acta* 2015; **1853**(10 Pt A): 2240-2250.  
940  
941 85. Maitra U, Deng H, Glaros T, Baker B, Capelluto DG, Li Z *et al.* Molecular mechanisms  
942 responsible for the selective and low-grade induction of proinflammatory mediators  
943 in murine macrophages by lipopolysaccharide. *J Immunol* 2012; **189**(2): 1014-1023.  
944

- 945 86. Clark AR, Lasa M. Crosstalk between glucocorticoids and mitogen-activated protein  
946 kinase signalling pathways. *Curr Opin Pharmacol* 2003; **3**(4): 404-411.  
947
- 948 87. Shen C, Chen Y-J. Preparation of Pre- and Post-synaptic Density Fraction from Mouse  
949 Cortex. *Bio-protocol* 2013; **3**(17): e880.  
950
- 951 88. Etherton MR, Tabuchi K, Sharma M, Ko J, Sudhof TC. An autism-associated point  
952 mutation in the neuroligin cytoplasmic tail selectively impairs AMPA receptor-  
953 mediated synaptic transmission in hippocampus. *EMBO J* 2011; **30**(14): 2908-2919.  
954
- 955 89. Ewels PA, Peltzer A, Fillinger S, Patel H, Alneberg J, Wilm A *et al.* The nf-core  
956 framework for community-curated bioinformatics pipelines. *Nat Biotechnol* 2020;  
957 **38**(3): 276-278.  
958
- 959 90. Dobin A, Davis CA, Schlesinger F, Drenkow J, Zaleski C, Jha S *et al.* STAR: ultrafast  
960 universal RNA-seq aligner. *Bioinformatics* 2013; **29**(1): 15-21.  
961
- 962 91. Anders S, Pyl PT, Huber W. HTSeq--a Python framework to work with high-  
963 throughput sequencing data. *Bioinformatics* 2015; **31**(2): 166-169.  
964
- 965 92. Robinson MD, McCarthy DJ, Smyth GK. edgeR: a Bioconductor package for  
966 differential expression analysis of digital gene expression data. *Bioinformatics* 2010;  
967 **26**(1): 139-140.  
968
- 969 93. Pibiri F, Nelson M, Guidotti A, Costa E, Pinna G. Decreased corticolimbic  
970 allopregnanolone expression during social isolation enhances contextual fear: A  
971 model relevant for posttraumatic stress disorder. *Proc Natl Acad Sci U S A* 2008;  
972 **105**(14): 5567-5572.  
973
- 974 94. Inoue T, Hoshina N, Nakazawa T, Kiyama Y, Kobayashi S, Abe T *et al.* LMTK3  
975 deficiency causes pronounced locomotor hyperactivity and impairs endocytic  
976 trafficking. *J Neurosci* 2014; **34**(17): 5927-5937.  
977
- 978 95. Kudo T, Morohashi Y, Yazaki-Sugiyama Y. Early Auditory Experience Modifies  
979 Neuronal Firing Properties in the Zebra Finch Auditory Cortex. *Frontiers in Neural*  
980 *Circuits* 2020; **14**.  
981
- 982 96. Augustinaite S, Kuhn B. Complementary Ca(2+) Activity of Sensory Activated and  
983 Suppressed Layer 6 Corticothalamic Neurons Reflects Behavioral State. *Curr Biol*  
984 2020; **30**(20): 3945-3960 e3945.  
985
- 986 97. Matsuura K, Mohamed HMA, Youssef MMM, Yamamoto T. Synaptotagmin 2 is  
987 ectopically overexpressed in excitatory presynapses of a widely used CaMKII $\alpha$ -Cre  
988 mouse line. *bioRxiv* 2021: 2021.2006.2030.450492.  
989  
990  
991



992  
993  
994  
995  
996

### Figure Legends:

#### 997 Fig.1: **TOB protein expression levels increase in response to stress**

998 A) Expression patterns of TOB in lysates of different mouse brain regions (n=3). B)  
999 Immunoblotting of TOB, synaptophysin, and PSD-95 in hippocampal fractionated lysates:  
1000 soluble fraction S2, synaptoneuroosomes, pre-synaptic, and post-synaptic fractions. C) Western  
1001 blotting of TOB expression levels in hippocampal lysates without stress and after 30 min of  
1002 restraint stress at different times: 15 min, 1 h, 3 h, 5 h after stress exposure (n=4). D) Western  
1003 blotting of TOB expression levels in hippocampal lysates without stress and after inescapable  
1004 electric shock for different durations: 15 min, 1 h, 3 h, 5 h post-exposure to stress (n=3). One-  
1005 way analysis of variance (ANOVA) followed by Dunnett's post-hoc correction for multiple  
1006 comparisons: statistical significance \* $p < 0.05$  \*\* $p < 0.01$  when compared to control (No stress).  
1007 Data are presented as means  $\pm$  SEMs.  
1008  
1009

#### 1010 Fig.2: **Deletion of *Tob* alters brain functional connectivity**

1011 A) Experimental Schedule. After surgery to introduce a head-fixation bar on the skull, mice  
1012 were allowed to recovery. After recovery periods, mice underwent habituation training 2 h for  
1013 7 days prior to fMRI sessions. B) Surgery. A plastic head-fixation bar was mounted on the  
1014 skull with dental cement. C) Habituation Training. In order to reduce scanning stress, mice  
1015 were fixated with a fixation platform, and their bodies were constrained in a plastic tube. They  
1016 were exposed to scanning sounds for 2 h for 7 days in order to reduce stress responses. D)  
1017 Statistical functional map with the seed region, CA1. Average BOLD signals were extracted  
1018 from bilateral CA1. Seed-based functional connectivity was performed, and a statistical map  
1019 was visualized ( $p < 0.05$  after cluster correction; Fig. S1). E) Functional connectivity with the  
1020 bilateral CA1 seed. Seed-based FC analysis revealed statistically significant FC in CA1-DG1-  
1021 3 in the *Tob* KO group with Mann-Whitney U test (\*\*  $p < 0.01$  with Bonferroni Correction).  
1022 F) Statistical functional map with the seed region, mPFC. Average BOLD signals were  
1023 extracted from the mPFC. Seed-based functional connectivity was performed, and a statistical  
1024 map was visualized  $< 0.05$  after cluster correction; Fig. S1). G) Functional connectivity with  
1025 the mPFC seed. Seed-based FC analysis revealed statistically significant FC in mPFC-DG in  
1026 the *Tob* KO group (\*\*\*)  $p < 0.001$  with Bonferroni Correction).  
1027

#### 1028 Fig.3: **Altered excitatory/inhibitory balance in *Tob*-KO hippocampal slices**

1029 A) Representative traces of mEPSCs recorded from hippocampal pyramidal neurons of wild-  
1030 type (WT, left traces) and *Tob* knockout (KO, right traces) at  $V_h$  of -70 mV in the presence of  
1031 1  $\mu$ M tetrodotoxin and 100  $\mu$ M PTX. Scale bars, 50 pA and 500 ms. B) Cumulative distribution  
1032 plots and summary bar graphs for mEPSC amplitude (inset shows the average mEPSC  
1033 amplitude) in CA1 hippocampal pyramidal neurons of wild-type (white column) and *Tob*-KO  
1034 (grey column) mice. \*\*\* $p < 0.0001$  by Kolmogorov-Smirnov test in the cumulative distribution  
1035 plot and \* $p = 0.0453$  by unpaired Student's *t* test in the bar graph. C) Cumulative distribution  
1036 plots and summary bar graphs for the mEPSC inter-event interval (inset shows the average of  
1037 mEPSC frequency) in CA1 hippocampal pyramidal neurons of wild-type (white column) and  
1038 *Tob*-KO (grey column) mice.  $p = 0.4611$  by Kolmogorov-Smirnov test in the cumulative  
1039 distribution plot and  $p = 0.6164$  by unpaired Student's *t* test in the bar graph. D) Sample traces  
1040 (upper panel) and summary plots for the input-output relationship of AMPA receptor-mediated  
1041 responses recorded from wild-type (open circles) and *Tob*-KO (grey circles) mice. Scale bars,

1042 100 pA and 20 ms.  $**p = 0.0039$  by Mann-Whitney U test. E) Sample traces (upper panel) and  
1043 summary plots for the I-V curve of AMPA receptor-mediated responses recorded from wild-  
1044 type (open circles) and *Tob*-KO (grey circles) mice. Scale bars, 100 pA and 30 ms. F) Sample  
1045 traces with 50-ms inter-pulse interval (upper panel) and summary plots for paired-pulse ratio  
1046 of AMPA receptor-mediated responses at 10, 30, 50, 100, 200 and 300 ms inter-pulse intervals  
1047 recorded from wild-type (open circles) and *Tob*-KO (grey circles) mice. Scale bars, 100 pA  
1048 and 50 ms.  $*p = 0.0139$  by Mann-Whitney U test;  $***p < 0.0011$  by Two-way ANOVA  
1049 with Sidak's multiple comparisons test. G) Representative traces of mIPSCs recorded from  
1050 hippocampal pyramidal neurons of wild-type (WT, left traces) and *Tob*-KO (KO, right traces)  
1051 at  $V_h$  of -70 mV in the presence of 1  $\mu$ M tetrodotoxin and 100  $\mu$ M PTX. Scale bars, 20 pA and  
1052 500 ms. H) Cumulative distribution plots and summary bar graphs for mIPSC amplitude (inset  
1053 shows the average of mIPSC amplitude) in CA1 hippocampal pyramidal neurons of wild-type  
1054 (white column) and *Tob*-KO (grey column) mice.  $***p < 0.0001$  by Kolmogorov-Smirnov test  
1055 in the cumulative distribution plot and  $*p = 0.0120$  by unpaired Student's *t* test in the bar graph.  
1056 I) Cumulative distribution plots and summary bar graphs for the mIPSC inter-event interval  
1057 (inset shows the average of mIPSC frequency) in CA1 hippocampal pyramidal neurons of wild-  
1058 type (white column) and *Tob*-KO (grey column) mice.  $p = 0.9311$  by Kolmogorov-Smirnov  
1059 test in the cumulative distribution plot and  $p = 0.1633$  by unpaired Student's *t* test in the bar  
1060 graph. J) Representative traces of evoked EPSCs at  $V_h = -60$  mV and evoked IPSCs at  $V_h = 0$   
1061 mV in wild-type (left) and *Tob*-KO (right) mice. Scale bars, 50 pA and 30 ms. K) Amplitudes  
1062 of evoked EPSCs at  $V_h$  of -60 mV and evoked IPSCs at  $V_h$  of 0 mV at each of individual  
1063 recorded WT and *Tob*-KO hippocampal pyramidal neurons. L) Average excitation/inhibition  
1064 ratio from WT (open column) and *Tob*-KO (grey column).  $*p = 0.0343$  by unpaired Student's  
1065 *t* test. Data are expressed as means  $\pm$  SEMs. Total numbers of cells recorded / total numbers of  
1066 mice used are indicated in parentheses.

1067

#### 1068 Fig.4: ***Tob*-KO mice show hippocampal-mediated abnormal stress-related behavior**

1069 Behavioral analyses in *Tob*-WT and KO mice and after overexpression of mouse TOB using  
1070 AAV (hSyn-mTob) (A-D). A) Contextual fear conditioning and extinction expressed as  
1071 percentage of time spent freezing. Two-way ANOVA followed by Bonferoni's *post-hoc* test  
1072 for multiple comparisons. B) The forced swim test presented as a percentage of immobile time.  
1073 One-way ANOVA followed by Bonferoni's *post-hoc* test for multiple comparisons. C)  
1074 Elevated-plus maze showing the percentage of time spent in open arm. One-way ANOVA  
1075 followed by Bonferoni's *post-hoc* test for multiple comparisons. D) Open field test showing  
1076 the percentage of time spent in center region. One-way ANOVA followed by Bonferoni's *post-*  
1077 *hoc* test for multiple comparisons. Behavioral analyses in hippocampal-specific *Tob*-  
1078 KO (hsTobKO) mice (E-I). E) Schematic diagram showing the method for generation of hippocampal-specific *Tob*-  
1079 KO (hsTobKO) mice through injection of adeno-associated virus expressing Cre recombinase  
1080 under the hSyn promoter (AAV\_hSyn\_Cre) in mice having LoxP sequences flanking both sides  
1081 of the *Tob* gene (*Tob*<sup>fl/fl</sup>). F) Contextual fear conditioning and extinction in hsTobKO presented  
1082 as percentage of time showing freezing. Two-way ANOVA followed by Bonferoni's *post-hoc*  
1083 test for multiple comparisons. G) The forced swim test is presented as percentage of time spent  
1084 immobile. H) The elevated-plus maze showed as the time spent in the open arm. I) Open field  
1085 test showing the percentage of time spent in the center region. Unpaired *t*-test. All values  
1086 represent means  $\pm$  SEMs. ns non-significant,  $* p < 0.05$ ,  $**p < 0.01$ ,  $***p < 0.001$ ,  $****p < 0.0001$

1087

#### 1088 Fig.5: **Abnormal transient transcriptional profile in hippocampus of *Tob*-KO mice and suppressed stress-induced LCN2 expression induced after fear conditioning training.**

1089 A) Heatmaps for differentially expressed genes in hippocampi of *Tob*-KO compared to *Tob*-  
1091 WT mice using RNA sequencing without fear conditioning training (naïve) and 15 min, 1 h, 3

1092 h after fear conditioning training (represented as z-scores of log raw counts,  $FC_{\text{upregulated}} > 2$   
1093  $FC_{\text{downregulated}} < 0.5$ ,  $p < 0.05$ ,  $FDR < 0.05$ ). B) Pathway analysis for RNA sequencing candidates  
1094 using IPA software showing activation of hormonal concentration in hippocampus of Tob KO  
1095 mice at 15 minutes post-conditioning. C) Real-time PCR for lipocalin-2 (*Lcn2*) mRNA in  
1096 hippocampus of *Tob*-WT and KO naïve mice and 15 min, 1 h and 3 h after fear conditioning.  
1097 Two-way ANOVA followed by Bonferoni's *post-hoc* test for multiple comparisons. D)  
1098 Western blotting showing protein expression of LCN-2 in hippocampi of naïve *Tob*-KO mice  
1099 and at 15 min, 1 h and 3 h after fear conditioning training. E) Normalized band intensity for  
1100 LCN2 protein immunoblots. Two-way ANOVA followed by Bonferoni's *post-hoc* test for  
1101 multiple comparisons. F) Western blotting showing abnormal protein expression in  
1102 hippocampi of mice lacking *Tob* before and after fear conditioning training at 15 min, 1 h and  
1103 3 h. G) Western blot band intensity quantification plots at different time points post-training  
1104 compared to naïve *Tob*-WT (n=3). All values represent means  $\pm$  SEMs. ns non-significant, \*  
1105  $p < 0.05$ , \*\* $p < 0.01$ , \*\*\* $p < 0.001$ , \*\*\*\* $p < 0.0001$   
1106

Figure 1

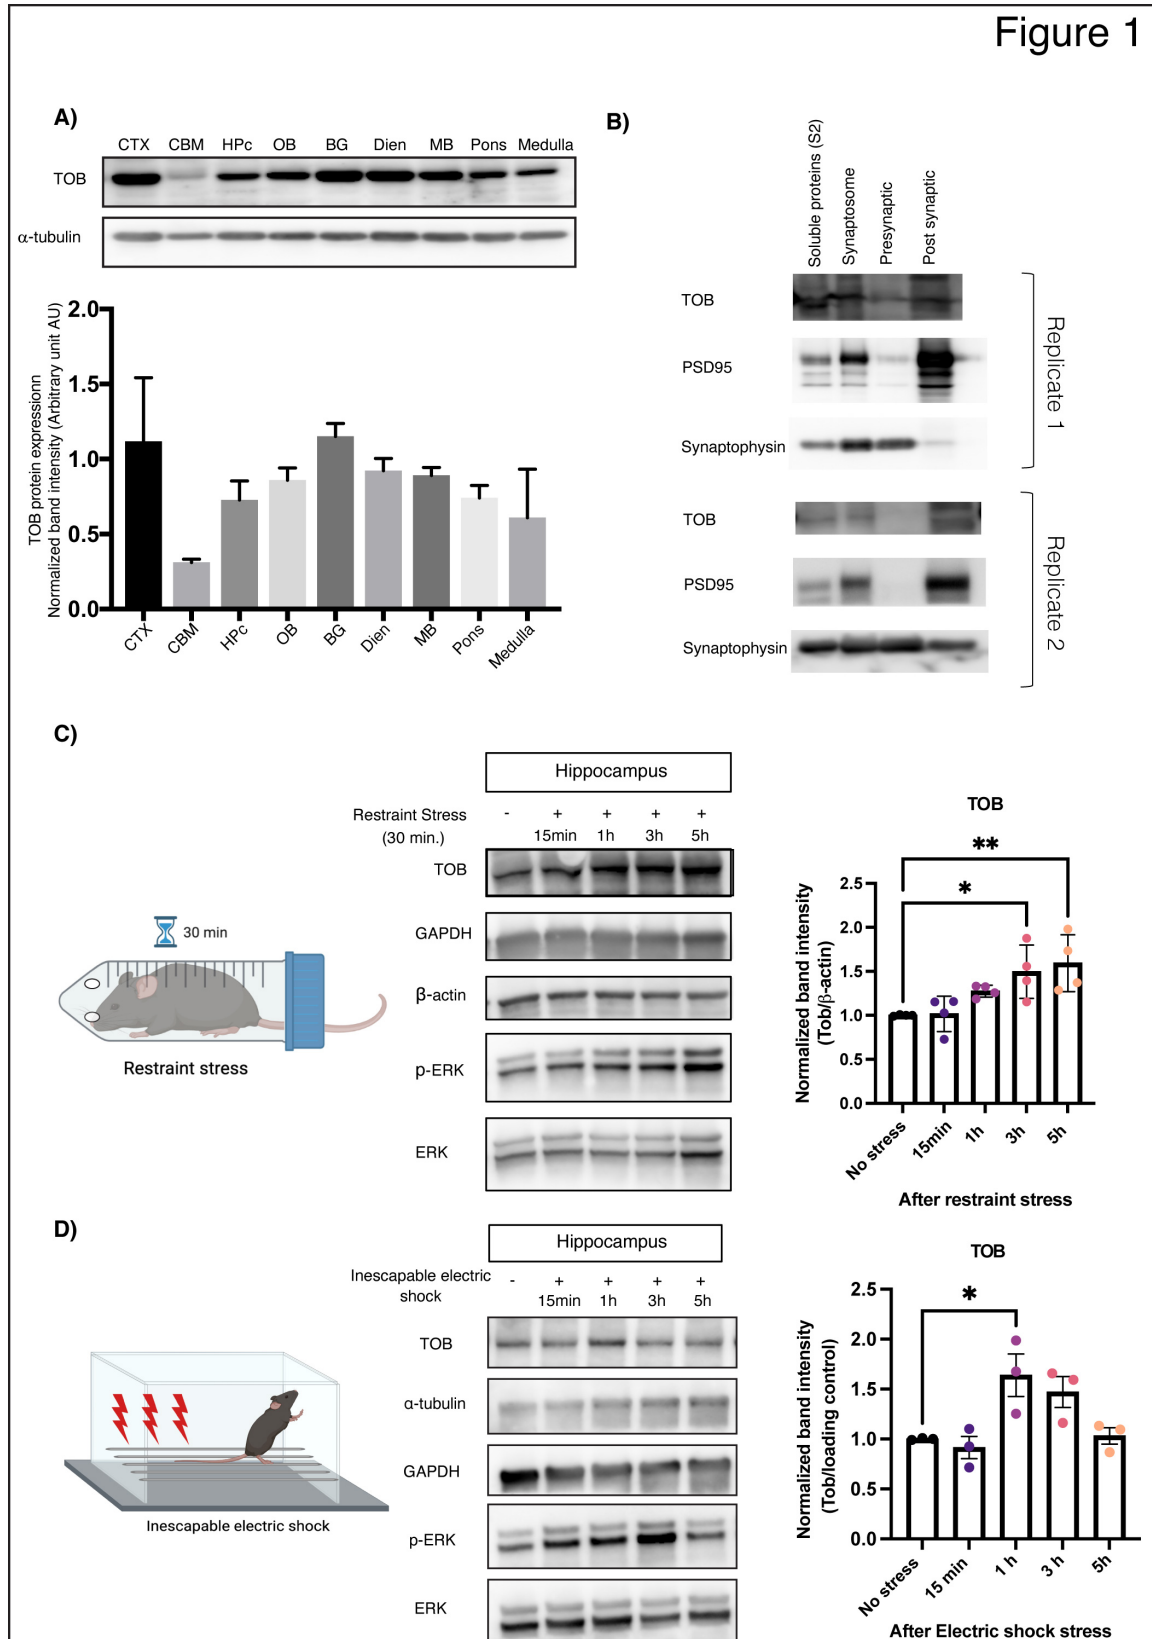

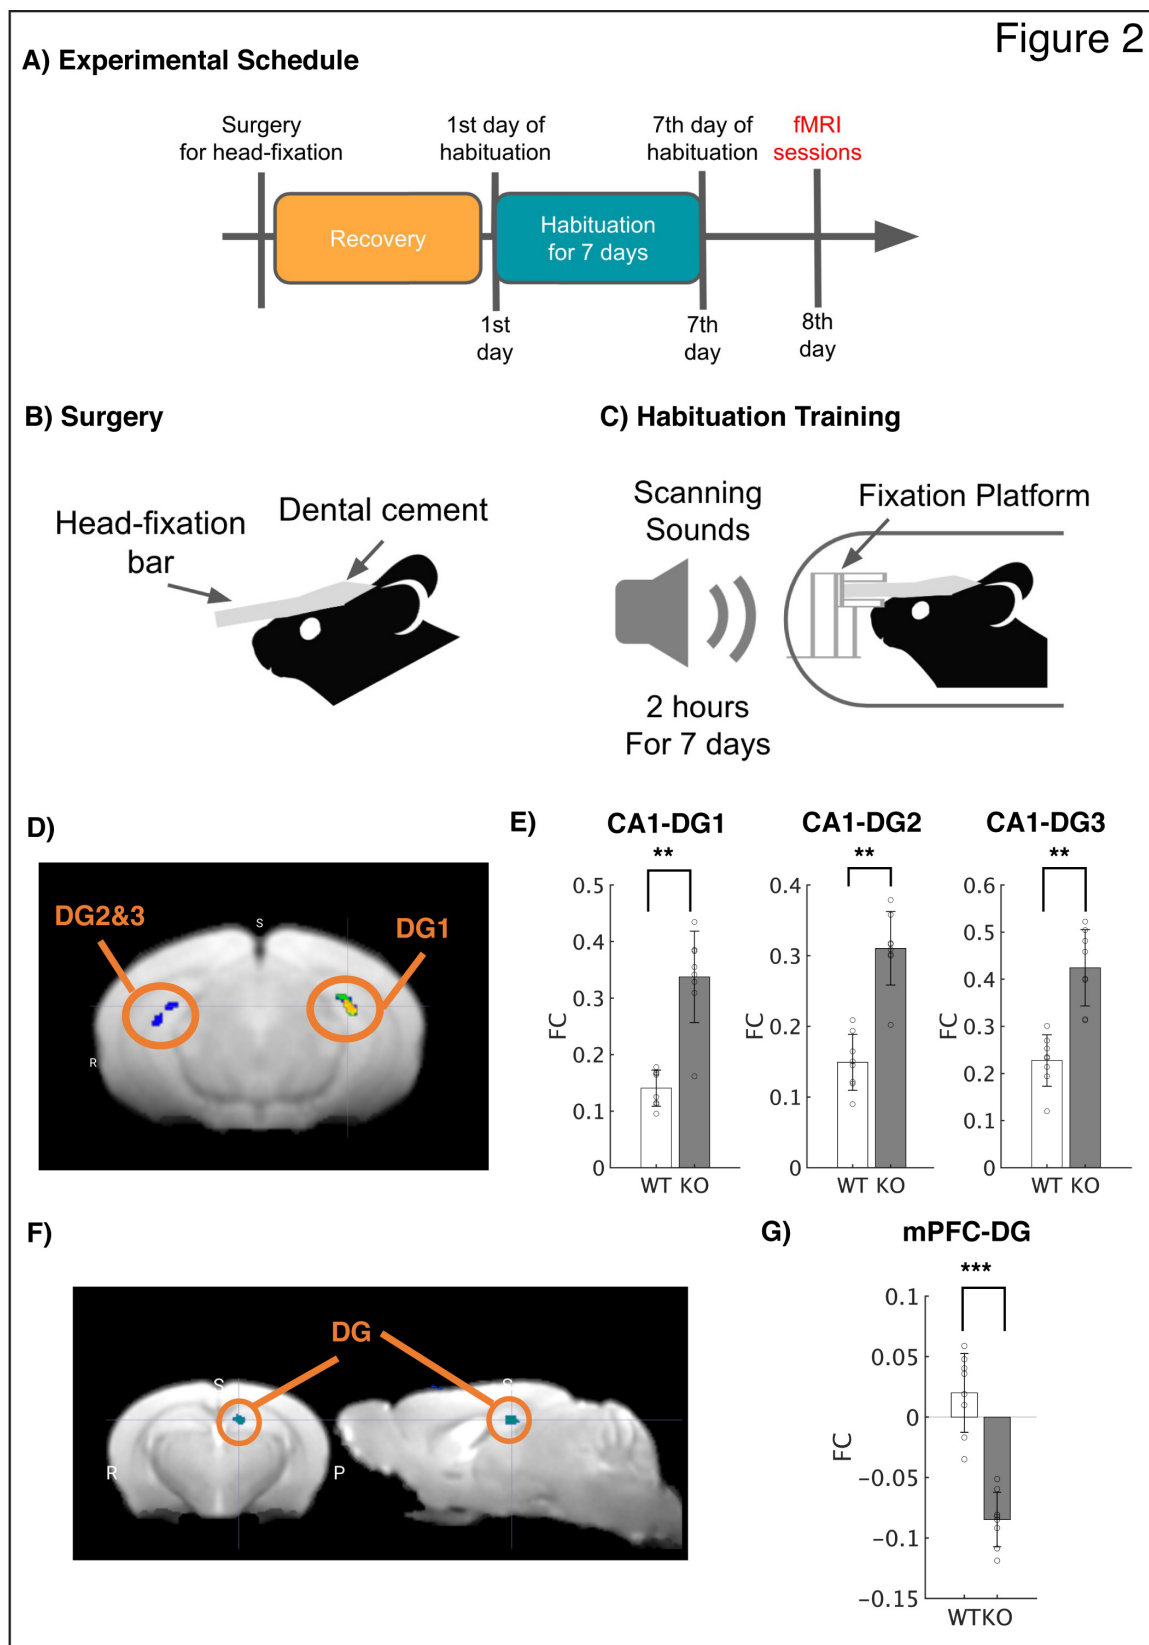

Figure 3

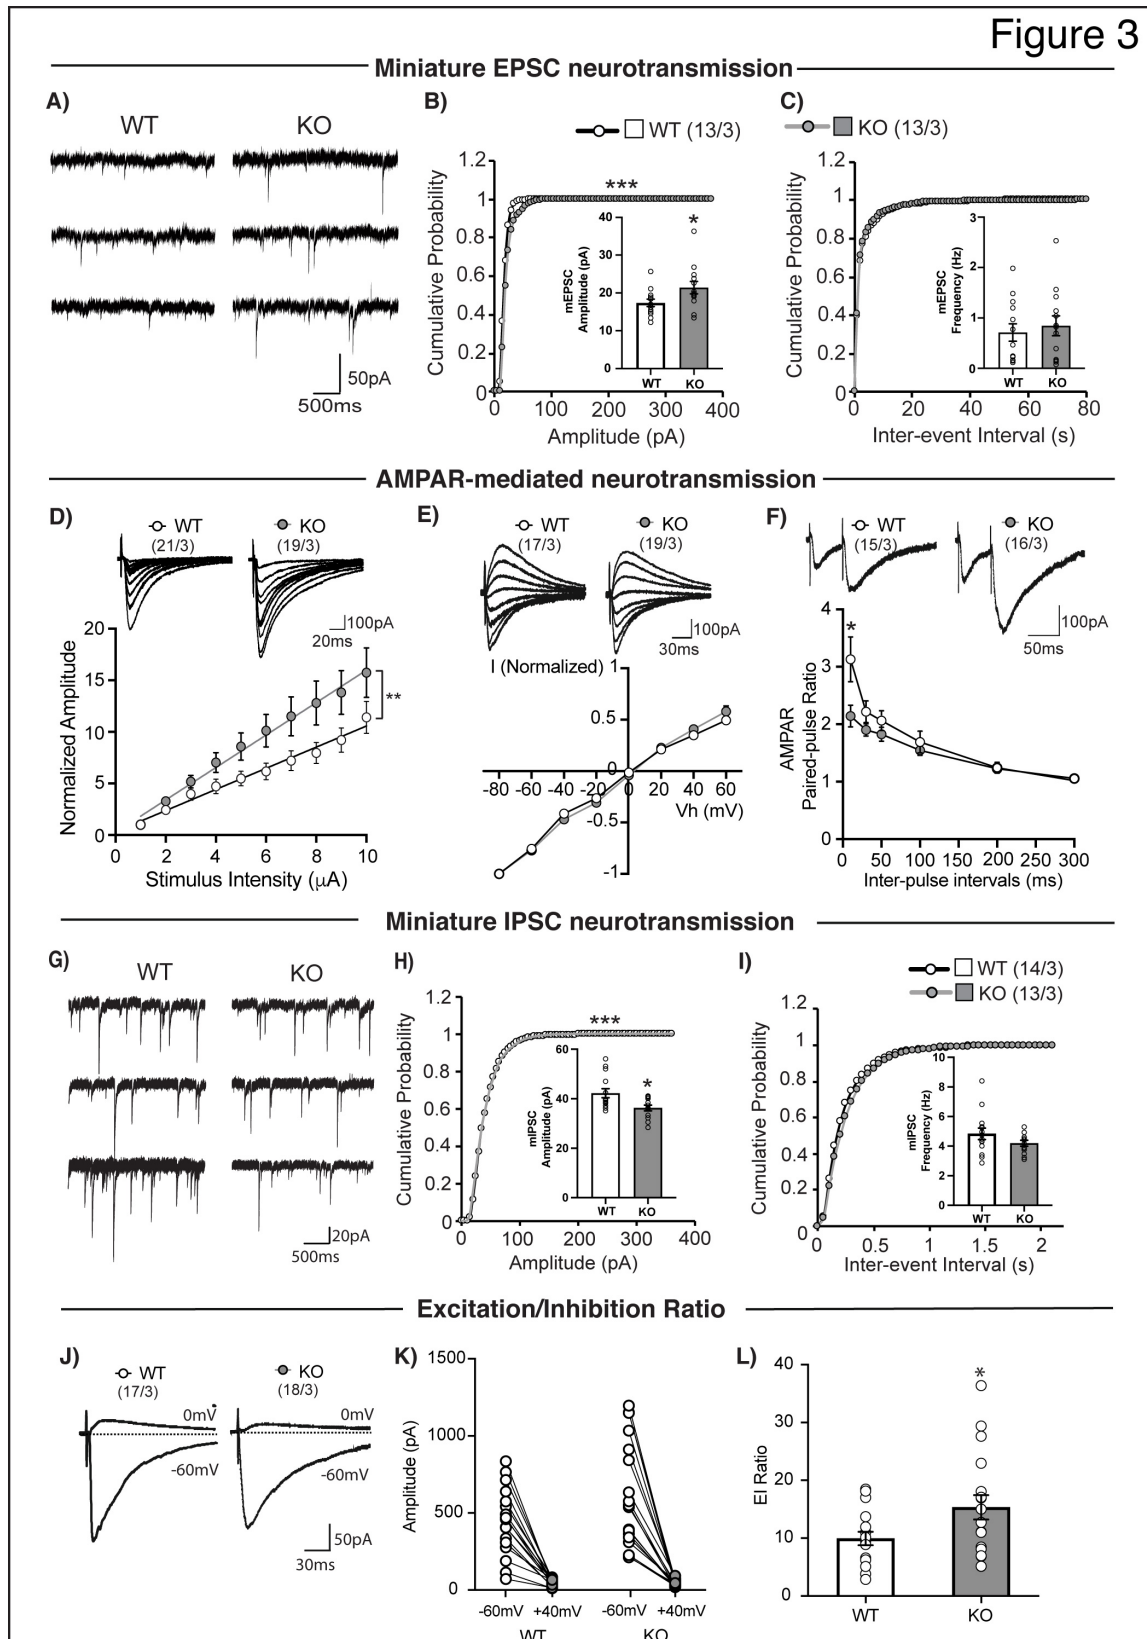

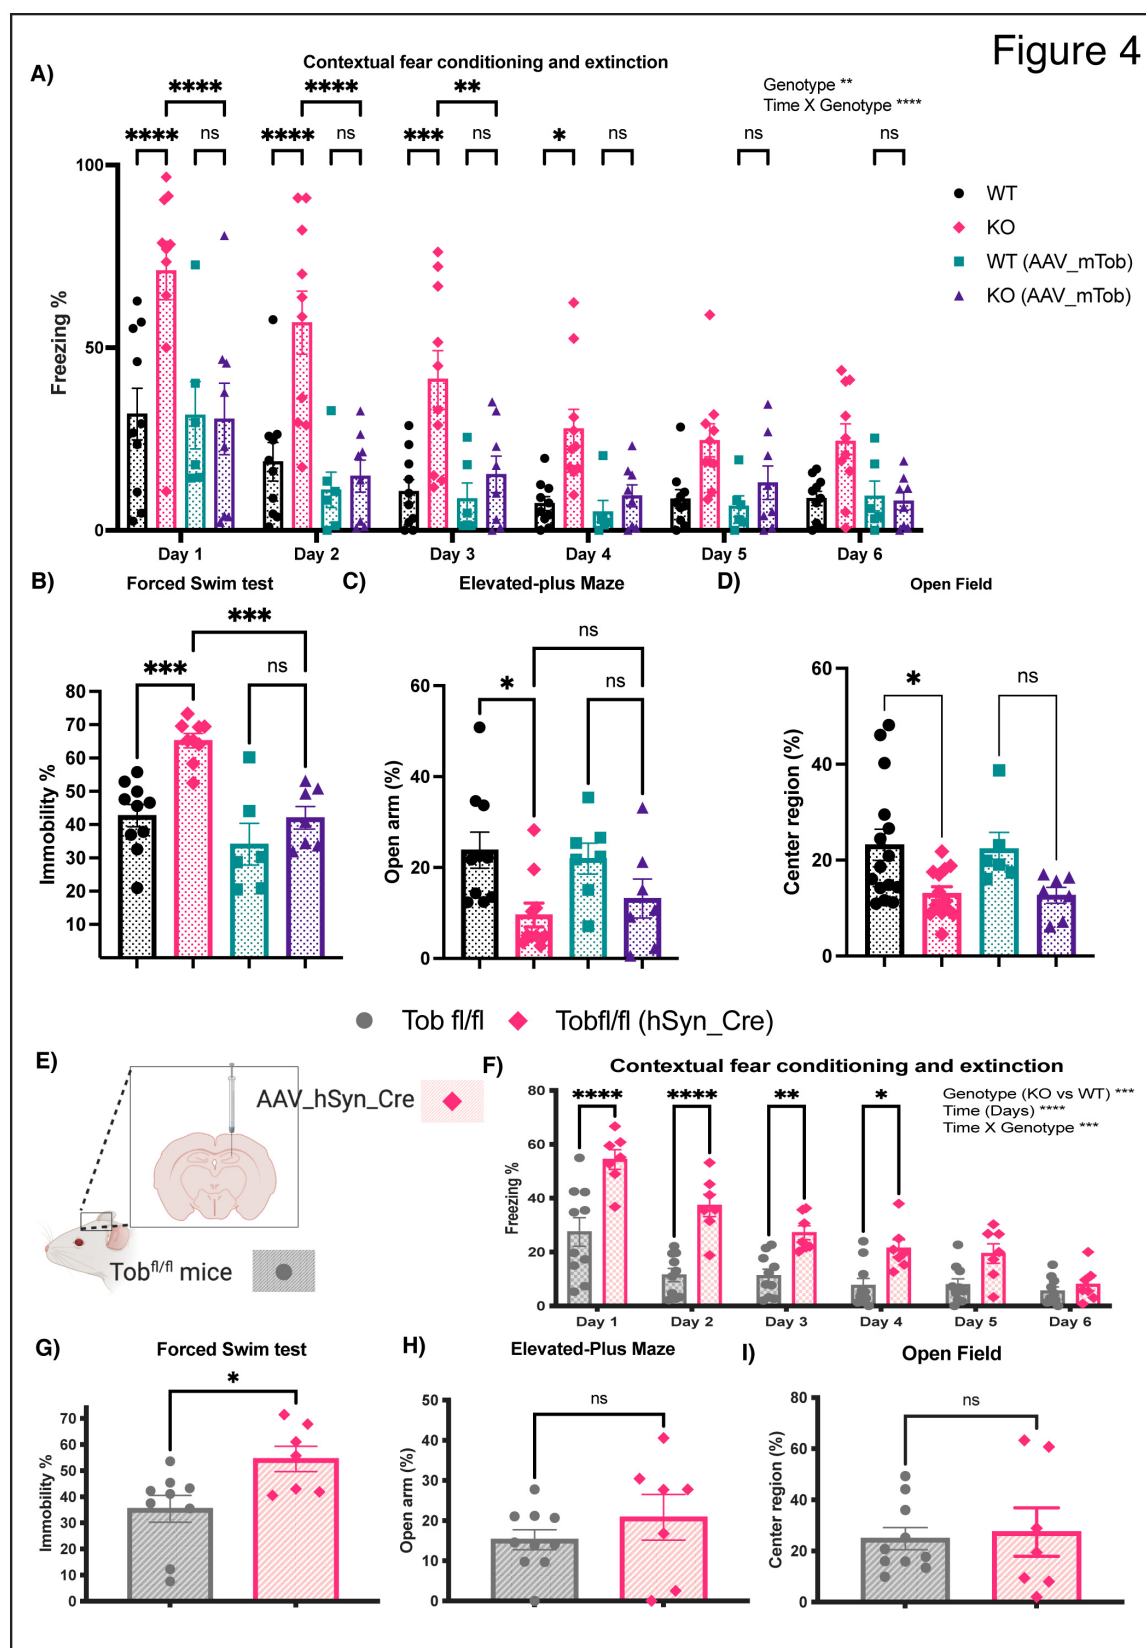

Figure 5

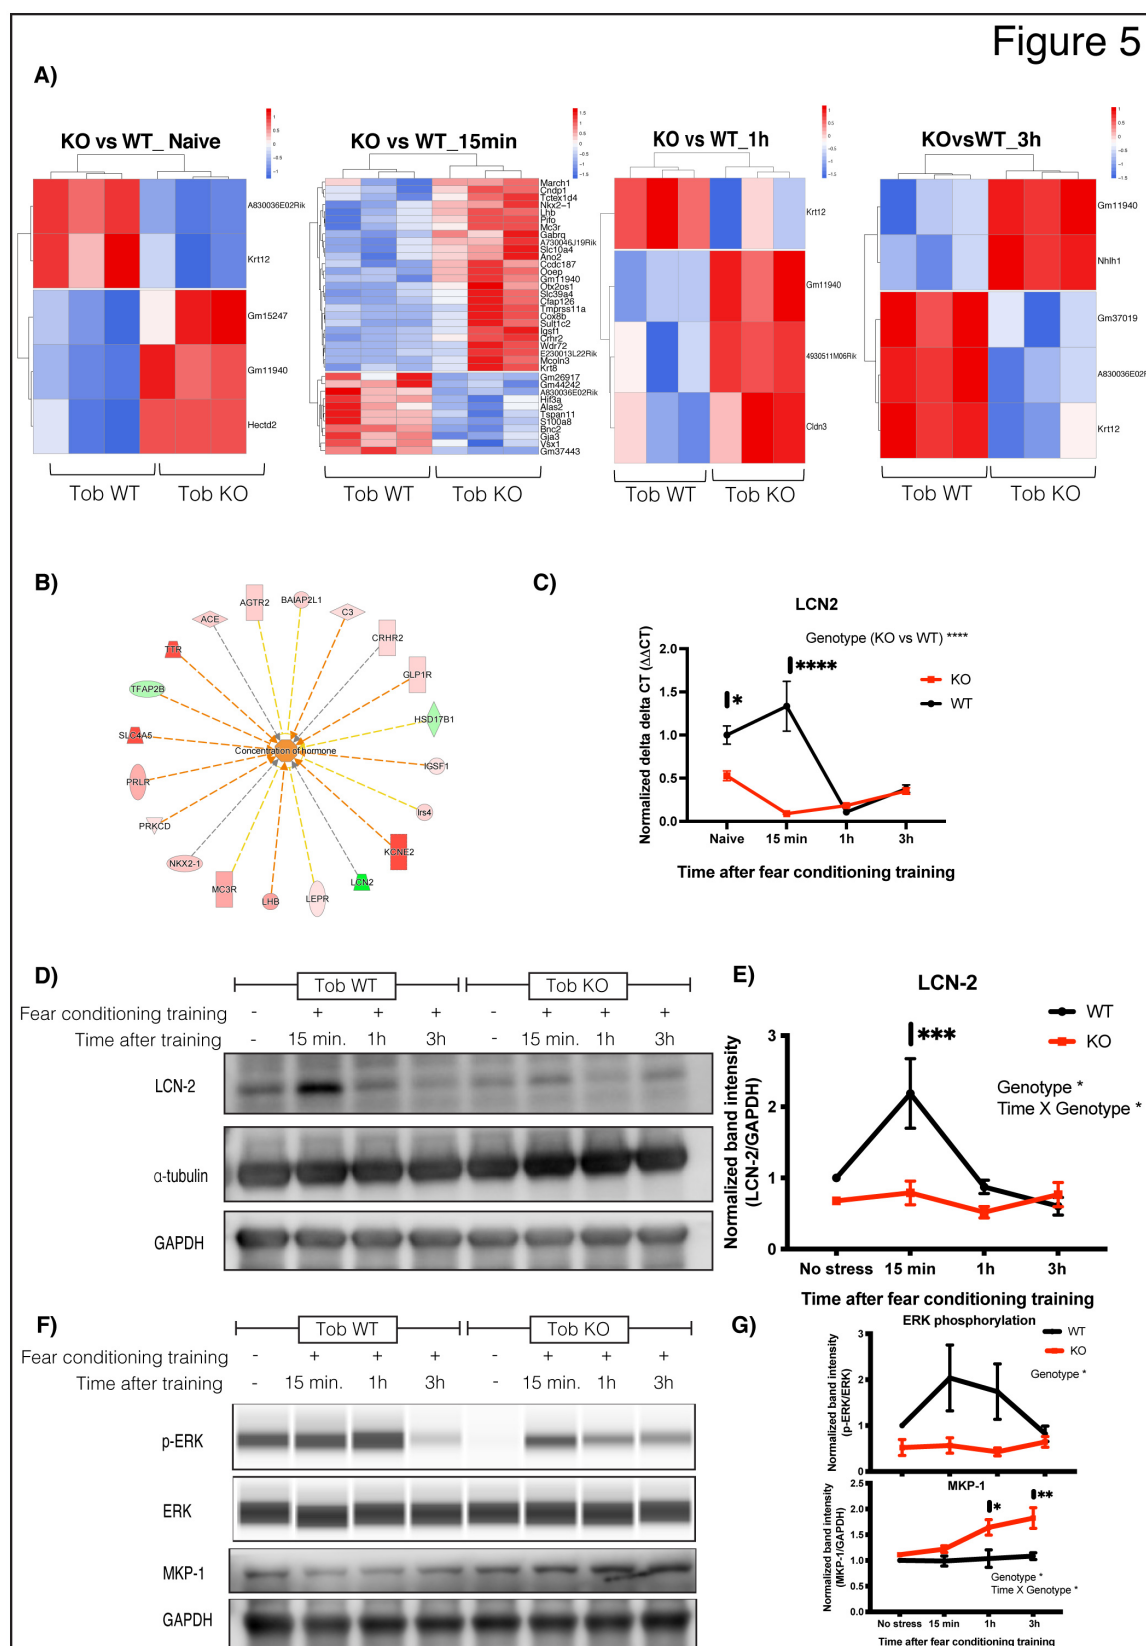

Source: https://www.biorxiv.org/content/10.1101/2022.05.16.492218v1.full.pdf
